# Supplementary material for: Emerging trends and knowledge structure of epilepsy during pregnancy research for 2000–2018: a bibliometric analysis
Source: PeerJ. 2019 Jun 7;7:e7115. doi: 10.7717/peerj.7115 (PMC6557303; doi:10.7717/peerj.7115)
Supplement: Supplemental Information 6 [file peerj-07-7115-s006.xls]

## Sheet: Sheet1
TRUE	162	0.02	2006	MORROW J, 2006, J NEUROL NEUROSUR PS, V77, P193, DOI 10.1136/JNNP.2005.074203
TRUE	137	0.01	2011	TOMSON T, 2011, LANCET NEUROL, V10, P609, DOI 10.1016/S1474-4422(11)70107-7
TRUE	106	0.02	2001	HOLMES LB, 2001, NEW ENGL J MED, V344, P1132, DOI 10.1056/NEJM200104123441504
TRUE	97	0.03	2009	MEADOR KJ, 2009, NEW ENGL J MED, V360, P1597, DOI 10.1056/NEJMOA0803531
TRUE	92	0.05	2004	ADAB N, 2004, J NEUROL NEUROSUR PS, V75, P1575, DOI 10.1136/JNNP.2003.029132
TRUE	86	0.02	2012	HERNANDEZ-DIAZ S, 2012, NEUROLOGY, V78, P1692, DOI 10.1212/WNL.0B013E3182574F39
TRUE	80	0	2013	MEADOR KJ, 2013, LANCET NEUROL, V12, P244, DOI 10.1016/S1474-4422(12)70323-X
TRUE	76	0.02	2005	ARTAMA M, 2005, NEUROLOGY, V64, P1874, DOI 10.1212/01.WNL.0000163771.96962.1F
TRUE	74	0.03	2004	WIDE K, 2004, ACTA PAEDIATR, V93, P174, DOI 10.1080/08035250310021118
TRUE	73	0.02	2005	WYSZYNSKI DF, 2005, NEUROLOGY, V64, P961, DOI 10.1212/01.WNL.0000154516.43630.C5
TRUE	72	0.25	2004	GAILY E, 2004, NEUROLOGY, V62, P28, DOI 10.1212/WNL.62.1.28
TRUE	70	0.01	2006	TOMSON T, 2006, NEUROLOGY, V66, P354
TRUE	66	0.01	2013	CHRISTENSEN J, 2013, JAMA-J AM MED ASSOC, V309, P1696, DOI 10.1001/JAMA.2013.2270
TRUE	63	0.03	1999	KANEKO S, 1999, EPILEPSY RES, V33, P145, DOI 10.1016/S0920-1211(98)00084-9
TRUE	60	0.02	2008	MEADOR K, 2008, EPILEPSY RES, V81, P1, DOI 10.1016/J.EPLEPSYRES.2008.04.022
TRUE	59	0.15	2001	ADAB N, 2001, J NEUROL NEUROSUR PS, V70, P15, DOI 10.1136/JNNP.70.1.15
TRUE	56	0.04	2003	KAAJA E, 2003, NEUROLOGY, V60, P575, DOI 10.1212/01.WNL.0000044157.28073.DC
TRUE	56	0.01	2006	MEADOR KJ, 2006, NEUROLOGY, V67, P407, DOI 10.1212/01.WNL.0000227919.81208.B2
TRUE	55	0.04	2004	HOLMES LB, 2004, ARCH NEUROL-CHICAGO, V61, P673, DOI 10.1001/ARCHNEUR.61.5.673
TRUE	54	0	2004	PENNELL PB, 2004, NEUROLOGY, V62, P292, DOI 10.1212/01.WNL.0000103286.47129.F8
TRUE	52	0.01	2011	MOLGAARD-NIELSEN D, 2011, JAMA-J AM MED ASSOC, V305, P1996, DOI 10.1001/JAMA.2011.624
TRUE	52	0.02	1999	SAMREN EB, 1999, ANN NEUROL, V46, P739
TRUE	51	0.04	2002	TRAN TA, 2002, NEUROLOGY, V59, P251, DOI 10.1212/WNL.59.2.251
TRUE	51	0.02	2000	OHMAN I, 2000, EPILEPSIA, V41, P709, DOI 10.1111/J.1528-1157.2000.TB00232.X
TRUE	51	0.02	2010	JENTINK J, 2010, NEW ENGL J MED, V362, P2185, DOI 10.1056/NEJMOA0907328
TRUE	50	0.01	2009	HARDEN CL, 2009, EPILEPSIA, V50, P1237, DOI 10.1111/J.1528-1167.2009.02129.X
TRUE	50	0.02	2009	HARDEN CL, 2009, NEUROLOGY, V73, P133, DOI 10.1212/WNL.0B013E3181A6B312
TRUE	49	0	2012	TOMSON T, 2012, LANCET NEUROL, V11, P803, DOI 10.1016/S1474-4422(12)70103-5
TRUE	48	0.02	2008	HUNT S, 2008, NEUROLOGY, V71, P272, DOI 10.1212/01.WNL.0000318293.28278.33
TRUE	47	0.02	2005	VINTEN J, 2005, NEUROLOGY, V64, P949, DOI 10.1212/01.WNL.0000154514.82948.69
TRUE	47	0.03	2007	TOMSON T, 2007, EPILEPSIA, V48, P1111, DOI 10.1111/J.1528-1167.2007.01032.X
TRUE	46	0	2005	CUNNINGTON M, 2005, NEUROLOGY, V64, P955, DOI 10.1212/01.WNL.0000154515.94346.89
TRUE	42	0.12	2009	GLASS HC, 2009, J PEDIATR-US, V155, P318, DOI 10.1016/J.JPEDS.2009.03.040
TRUE	42	0.01	2003	SABERS A, 2003, NEUROLOGY, V61, P570, DOI 10.1212/01.WNL.0000076485.09353.7A
TRUE	41	0.01	2004	FRIED S, 2004, DRUG SAFETY, V27, P197, DOI 10.2165/00002018-200427030-00004
TRUE	39	0	2004	VAJDA FJ, 2004, J CLIN NEUROSCI, V11, P854, DOI 10.1016/J.JOCN.2004.05.003
TRUE	39	0.02	2009	HARDEN CL, 2009, NEUROLOGY, V73, P142, DOI 10.1212/WNL.0B013E3181A6B325
TRUE	38	0.04	2008	PENNELL PB, 2008, NEUROLOGY, V70, P2130, DOI 10.1212/01.WNL.0000289511.20864.2A
TRUE	37	0.02	2004	SABERS A, 2004, ACTA NEUROL SCAND, V109, P9, DOI 10.1034/J.1600-0404.2003.00200.X
TRUE	37	0.02	2009	HARDEN CL, 2009, NEUROLOGY, V73, P126, DOI 10.1212/WNL.0B013E3181A6B2F8
TRUE	37	0.3	2008	MURRAY DM, 2008, ARCH DIS CHILD-FETAL, V93, P0, DOI 10.1136/ADC.2005.086314
TRUE	36	0	2013	BATTINO D, 2013, EPILEPSIA, V54, P1621, DOI 10.1111/EPI.12302
TRUE	35	0	2013	BROMLEY RL, 2013, J NEUROL NEUROSUR PS, V84, P637, DOI 10.1136/JNNP-2012-304270
TRUE	35	0.03	2011	MEADOR KJ, 2011, BRAIN, V134, P396, DOI 10.1093/BRAIN/AWQ352
TRUE	35	0.09	2006	TEKGUL H, 2006, PEDIATRICS, V117, P1270, DOI 10.1542/PEDS.2005-1178
TRUE	35	0.08	1997	SAMREN EB, 1997, EPILEPSIA, V38, P981, DOI 10.1111/J.1528-1157.1997.TB01480.X
TRUE	35	0.01	2008	HOLMES LB, 2008, NEUROLOGY, V70, P2152, DOI 10.1212/01.WNL.0000304343.45104.D6
TRUE	35	0	2004	DE HAAN G, 2004, NEUROLOGY, V63, P571, DOI 10.1212/01.WNL.0000133213.10244.FD
TRUE	34	0.08	1999	CANGER R, 1999, EPILEPSIA, V40, P1231, DOI 10.1111/J.1528-1157.1999.TB00851.X
TRUE	34	0.01	2014	CAMPBELL E, 2014, J NEUROL NEUROSUR PS, V85, P1029, DOI 10.1136/JNNP-2013-306318
TRUE	34	0.01	2011	SHALLCROSS R, 2011, NEUROLOGY, V76, P383, DOI 10.1212/WNL.0B013E3182088297
TRUE	32	0.02	2011	HOLMES LB, 2011, ARCH NEUROL-CHICAGO, V68, P1275, DOI 10.1001/ARCHNEUROL.2011.133
TRUE	32	0.02	2015	BAKER GA, 2015, NEUROLOGY, V84, P382, DOI 10.1212/WNL.0000000000001182
TRUE	32	0	2006	HUNT S, 2006, NEUROLOGY, V67, P1876, DOI 10.1212/01.WNL.0000244491.48937.55
TRUE	31	0.01	2010	MAWER G, 2010, SEIZURE-EUR J EPILEP, V19, P112, DOI 10.1016/J.SEIZURE.2009.11.008
TRUE	31	0.02	2013	MAWHINNEY E, 2013, NEUROLOGY, V80, P400, DOI 10.1212/WNL.0B013E31827F0874
TRUE	31	0.02	2006	VIINIKAINEN K, 2006, EPILEPSIA, V47, P186, DOI 10.1111/J.1528-1167.2006.00386.X
TRUE	31	0	2007	RONEN GM, 2007, NEUROLOGY, V69, P1816, DOI 10.1212/01.WNL.0000279335.85797.2C
TRUE	31	0.02	2000	HERNANDEZ-DIAZ S, 2000, NEW ENGL J MED, V343, P1608, DOI 10.1056/NEJM200011303432204
TRUE	31	0	2014	VEIBY G, 2014, J NEUROL, V261, P579, DOI 10.1007/S00415-013-7239-X
TRUE	30	0.01	2005	PETRENAITE V, 2005, EPILEPSY RES, V65, P185, DOI 10.1016/J.EPLEPSYRES.2005.06.004
TRUE	30	0	2006	VAJDA FJE, 2006, EUR J NEUROL, V13, P645, DOI 10.1111/J.1468-1331.2006.01359.X
TRUE	30	0.03	2011	SHELLHAAS RA, 2011, J CLIN NEUROPHYSIOL, V28, P611, DOI 10.1097/WNP.0B013E31823E96D7
TRUE	30	0.01	2009	ORNOY A, 2009, REPROD TOXICOL, V28, P1, DOI 10.1016/J.REPROTOX.2009.02.014
TRUE	30	0.01	2003	PENNELL PB, 2003, NEUROLOGY, V61, P0, DOI 10.1212/WNL.61.6_SUPPL_2.S35
TRUE	29	0.02	2009	VEIBY G, 2009, EPILEPSIA, V50, P2130, DOI 10.1111/J.1528-1167.2009.02147.X
TRUE	29	0	2005	ERIKSSON K, 2005, EPILEPSY RES, V65, P189, DOI 10.1016/J.EPLEPSYRES.2005.06.001
TRUE	29	0	2002	BITTIGAU P, 2002, P NATL ACAD SCI USA, V99, P15089, DOI 10.1073/PNAS.222550499
TRUE	29	0.02	2006	MAZZUCCHELLI I, 2006, EPILEPSIA, V47, P504, DOI 10.1111/J.1528-1167.2006.00459.X
TRUE	28	0.06	2011	CUMMINGS C, 2011, ARCH DIS CHILD, V96, P643, DOI 10.1136/ADC.2009.176990
TRUE	27	0.15	2010	BROMLEY RL, 2010, EPILEPSIA, V51, P2058, DOI 10.1111/J.1528-1167.2010.02668.X
TRUE	27	0.01	2002	MAWER G, 2002, SEIZURE-EUR J EPILEP, V11, P512, DOI 10.1016/S1059-1311(02)00135-8
TRUE	27	0.01	2005	PERUCCA E, 2005, LANCET NEUROL, V4, P781, DOI 10.1016/S1474-4422(05)70224-6
TRUE	26	0.01	2002	DEAN JCS, 2002, J MED GENET, V39, P251, DOI 10.1136/JMG.39.4.251
TRUE	26	0.01	2013	VEIBY G, 2013, EPILEPSIA, V54, P1462, DOI 10.1111/EPI.12226
TRUE	26	0.01	1998	OLAFSSON E, 1998, EPILEPSIA, V39, P887, DOI 10.1111/J.1528-1157.1998.TB01186.X
TRUE	25	0.01	2003	VAJDA FJ, 2003, J CLIN NEUROSCI, V10, P543, DOI 10.1016/S0967-5868(03)00158-9
TRUE	24	0.03	2012	GLASS HC, 2012, PEDIATR NEUROL, V46, P111, DOI 10.1016/J.PEDIATRNEUROL.2011.11.006
TRUE	24	0	2005	VAJDA FJE, 2005, ACTA NEUROL SCAND, V112, P137, DOI 10.1111/J.1600-0404.2005.00458.X
TRUE	24	0	2009	HARDEN CL, 2009, EPILEPSIA, V50, P1247, DOI 10.1111/J.1528-1167.2009.02130.X
TRUE	23	0	2006	CHRISTENSEN J, 2006, NEUROLOGY, V67, P1497, DOI 10.1212/01.WNL.0000240047.11166.0E
TRUE	23	0	2013	REISINGER TL, 2013, EPILEPSY BEHAV, V29, P13, DOI 10.1016/J.YEBEH.2013.06.026
TRUE	23	0.04	1998	GREENBERG MK, 1998, NEUROLOGY, V51, P944
TRUE	23	0	2002	MATALON S, 2002, REPROD TOXICOL, V16, P9, DOI 10.1016/S0890-6238(01)00199-X
TRUE	23	0	2007	TOMSON T, 2007, CLIN PHARMACOKINET, V46, P209, DOI 10.2165/00003088-200746030-00002
TRUE	23	0.01	2005	MANTHEY D, 2005, EXP NEUROL, V193, P497, DOI 10.1016/J.EXPNEUROL.2005.01.006
TRUE	23	0.16	2002	MILLER SP, 2002, NEUROLOGY, V58, P542, DOI 10.1212/WNL.58.4.542
TRUE	22	0	2010	BERG AT, 2010, EPILEPSIA, V51, P676, DOI 10.1111/J.1528-1167.2010.02522.X
TRUE	22	0	2004	RICHMOND JR, 2004, AM J OBSTET GYNECOL, V190, P371, DOI 10.1016/J.AJOG.2003.09.020
TRUE	21	0	2000	ARPINO C, 2000, EPILEPSIA, V41, P1436, DOI 10.1111/J.1528-1157.2000.TB00119.X
TRUE	21	0	2009	MORROW JI, 2009, J NEUROL NEUROSUR PS, V80, P506, DOI 10.1136/JNNP.2008.156109
TRUE	21	0	2008	PATSALOS PN, 2008, EPILEPSIA, V49, P1239, DOI 10.1111/J.1528-1167.2008.01561.X
TRUE	21	0.02	2002	TENNIS P, 2002, EPILEPSIA, V43, P1161, DOI 10.1046/J.1528-1157.2002.45901.X
TRUE	21	0	2015	MACDONALD SC, 2015, JAMA NEUROL, V72, P981, DOI 10.1001/JAMANEUROL.2015.1017
TRUE	20	0.01	2008	VOLPE JJ, 2008, NEUROLOGY NEWBORN, V0, P203
TRUE	20	0.04	2000	HOLMES LB, 2000, TERATOLOGY, V61, P196, DOI 10.1002/(SICI)1096-9926(200003)61:33.0.CO;2-T
TRUE	20	0.02	2000	FAIRGRIEVE SD, 2000, BRIT MED J, V321, P674, DOI 10.1136/BMJ.321.7262.674
TRUE	20	0	2011	CUNNINGTON MC, 2011, NEUROLOGY, V76, P1817, DOI 10.1212/WNL.0B013E31821CCD18
TRUE	20	0.01	2011	BORTHEN I, 2011, BJOG-INT J OBSTET GY, V118, P956, DOI 10.1111/J.1471-0528.2011.03004.X
TRUE	19	0.01	2011	NADEBAUM C, 2011, NEUROLOGY, V76, P719, DOI 10.1212/WNL.0B013E31820D62C7
TRUE	19	0.1	1998	HOLMES GL, 1998, ANN NEUROL, V44, P845, DOI 10.1002/ANA.410440602
TRUE	19	0.01	1999	KOCH S, 1999, EPILEPSIA, V40, P1237, DOI 10.1111/J.1528-1157.1999.TB00852.X
TRUE	19	0.01	2009	CHEN YH, 2009, ARCH NEUROL-CHICAGO, V66, P979, DOI 10.1001/ARCHNEUROL.2009.142
TRUE	19	0.01	2014	BROMLEY R, 2014, COCHRANE DB SYST REV, V0, P0, DOI 10.1002/14651858.CD010236.PUB2
TRUE	19	0.02	1997	TOMSON T, 1997, EPILEPSIA, V38, P1039, DOI 10.1111/J.1528-1157.1997.TB01489.X
TRUE	19	0.31	2003	BITTIGAU P, 2003, ANN NY ACAD SCI, V993, P103, DOI 10.1111/J.1749-6632.2003.TB07517.X
TRUE	18	0	2009	MEADOR KJ, 2009, EPILEPSY BEHAV, V15, P339, DOI 10.1016/J.YEBEH.2009.04.026
TRUE	18	0	2012	MEADOR KJ, 2012, NEUROLOGY, V78, P1207, DOI 10.1212/WNL.0B013E318250D824
TRUE	18	0.03	1996	ORNOY A, 1996, ARCH DIS CHILD, V75, P517, DOI 10.1136/ADC.75.6.517
TRUE	18	0.01	2014	EDEY S, 2014, EPILEPSIA, V55, P0, DOI 10.1111/EPI.12621
TRUE	18	0.01	2015	TOMSON T, 2015, EPILEPSIA, V56, P1006, DOI 10.1111/EPI.13021
TRUE	18	0	2015	VIALE L, 2015, LANCET, V386, P1845, DOI 10.1016/S0140-6736(15)00045-8
TRUE	18	0.01	2009	BORTHEN I, 2009, BJOG-INT J OBSTET GY, V116, P1736, DOI 10.1111/J.1471-0528.2009.02354.X
TRUE	17	0	2014	SHAH DK, 2014, ARCH DIS CHILD-FETAL, V99, P0, DOI 10.1136/ARCHDISCHILD-2013-305206
TRUE	17	0.02	1997	NULMAN I, 1997, AM J MED GENET, V68, P18, DOI 10.1002/(SICI)1096-8628(19970110)68:13.3.CO;2-C
TRUE	17	0	2007	CUNNINGTON M, 2007, EPILEPSIA, V48, P1207, DOI 10.1111/J.1528-1167.2007.01021.X
TRUE	17	0	2008	OHMAN I, 2008, EPILEPSIA, V49, P1075, DOI 10.1111/J.1528-1167.2007.01471.X
TRUE	17	0.02	2000	MCBRIDE MC, 2000, NEUROLOGY, V55, P506, DOI 10.1212/WNL.55.4.506
TRUE	17	0	2008	MEADOR KJ, 2008, NEUROLOGY, V71, P1109, DOI 10.1212/01.WNL.0000316199.92256.AF
TRUE	16	0.02	2004	MEISCHENGUISER R, 2004, EPILEPSY BEHAV, V5, P163, DOI 10.1016/J.YEBEH.2003.11.020
TRUE	16	0	2007	VAJDA FJE, 2007, AUST NZ J OBSTET GYN, V47, P468, DOI 10.1111/J.1479-828X.2007.00781.X
TRUE	15	0	2012	LOW E, 2012, ARCH DIS CHILD-FETAL, V97, P0, DOI 10.1136/ARCHDISCHILD-2011-300716
TRUE	15	0	2014	FISHER RS, 2014, EPILEPSIA, V55, P475, DOI 10.1111/EPI.12550
TRUE	15	0.01	2003	BARRETT C, 2003, EPILEPSY RESEARCH, V52, P147, DOI 10.1016/S0920-1211(02)00237-1
TRUE	14	0	2001	SABERS A, 2001, EPILEPSY RES, V47, P151, DOI 10.1016/S0920-1211(01)00305-9
TRUE	14	0	2007	SHELLHAAS RA, 2007, PEDIATRICS, V120, P770, DOI 10.1542/PEDS.2007-0514
TRUE	14	0	2001	ENGEL J, 2001, EPILEPSIA, V42, P796, DOI 10.1046/J.1528-1157.2001.10401.X
TRUE	14	0.02	2010	VAN ROOIJ L, 2010, PEDIATRICS, V125, P0, DOI 10.1542/PEDS.2009-0136
TRUE	14	0.01	1999	CRAWFORD P, 1999, SEIZURE-EUR J EPILEP, V8, P201, DOI 10.1053/SEIZ.1999.0295
TRUE	14	0.02	1994	SCOLNIK D, 1994, JAMA-J AM MED ASSOC, V271, P767, DOI 10.1001/JAMA.271.10.767
TRUE	14	0.02	2012	VAJDA FJE, 2012, J CLIN NEUROSCI, V19, P57, DOI 10.1016/J.JOCN.2011.08.003
TRUE	14	0	2013	VEIBY G, 2013, JAMA NEUROL, V70, P1367, DOI 10.1001/JAMANEUROL.2013.4290
TRUE	14	0	2004	GLIER C, 2004, EXP NEUROL, V187, P403, DOI 10.1016/J.EXPNEUROL.2004.01.025
TRUE	14	0	2004	TOMSON T, 2004, EPILEPSIA, V45, P1171, DOI 10.1111/J.0013-9580.2004.15104.X
TRUE	14	0	2008	DOLK H, 2008, NEUROLOGY, V71, P714, DOI 10.1212/01.WNL.0000316194.98475.D8
TRUE	14	0	2007	PISANI F, 2007, NEUROLOGY, V69, P2177, DOI 10.1212/01.WNL.0000295674.34193.9E
TRUE	14	0.01	2008	MARKRAM K, 2008, NEUROPSYCHOPHARMACOL, V33, P901, DOI 10.1038/SJ.NPP.1301453
TRUE	14	0	1998	SABERS A, 1998, ACTA NEUROL SCAND, V97, P164
TRUE	14	0	2007	MARSON AG, 2007, LANCET, V369, P1016, DOI 10.1016/S0140-6736(07)60461-9
TRUE	13	0	2008	THOMAS SV, 2008, EPILEPSY BEHAV, V13, P229, DOI 10.1016/J.YEBEH.2008.01.010
TRUE	13	0	2010	MEADOR KJ, 2010, NEUROLOGY, V75, P1954, DOI 10.1212/WNL.0B013E3181FFE4A9
TRUE	13	0.01	2004	TOMSON T, 2004, EPILEPSIA, V45, P1463, DOI 10.1111/J.0013-9580.2004.451101.X
TRUE	13	0	2005	CRAWFORD P, 2005, EPILEPSIA, V46, P117, DOI 10.1111/J.1528-1167.2005.00323.X
TRUE	13	0.01	2013	SRINIVASAKUMAR P, 2013, J PEDIATR-US, V163, P465, DOI 10.1016/J.JPEDS.2013.01.041
TRUE	13	0.01	1995	REINISCH JM, 1995, JAMA-J AM MED ASSOC, V274, P1518, DOI 10.1001/JAMA.274.19.1518
TRUE	13	0.01	2002	MCAULEY JW, 2002, CLIN PHARMACOKINET, V41, P559, DOI 10.2165/00003088-200241080-00002
TRUE	13	0	2011	GLASS HC, 2011, J PEDIATR-US, V159, P731, DOI 10.1016/J.JPEDS.2011.07.015
TRUE	13	0	1998	ZAHN CA, 1998, NEUROLOGY, V51, P949, DOI 10.1212/WNL.51.4.949
TRUE	13	0.1	2008	BROMLEY RL, 2008, NEUROLOGY, V71, P1923, DOI 10.1212/01.WNL.0000339399.64213.1A
TRUE	13	0	2008	VAJDA FJE, 2008, EPILEPSIA, V49, P172, DOI 10.1111/J.1528-1167.2007.01412.X
TRUE	12	0	2012	PENNELL PB, 2012, EPILEPSY BEHAV, V24, P449, DOI 10.1016/J.YEBEH.2012.05.010
TRUE	12	0.02	2001	HOLMES GL, 2001, PEDIATR RES, V49, P320, DOI 10.1203/00006450-200103000-00004
TRUE	12	0	2001	VOLPE JJ, 2001, NEUROLOGY NEWBORN, V0, P178
TRUE	12	0	2006	HOLMES LB, 2006, BIRTH DEFECTS RES A, V76, P318
TRUE	12	0	2002	KAAJA E, 2002, NEUROLOGY, V58, P549, DOI 10.1212/WNL.58.4.549
TRUE	12	0.01	2016	GLASS HC, 2016, J PEDIATR-US, V174, P98, DOI 10.1016/J.JPEDS.2016.03.035
TRUE	12	0	2013	TOMSON T, 2013, EPILEPSIA, V54, P405, DOI 10.1111/EPI.12109
TRUE	12	0	2014	SHALLCROSS R, 2014, NEUROLOGY, V82, P213, DOI 10.1212/WNL.0000000000000030
TRUE	12	0.01	2002	OHMAN I, 2002, EPILEPSIA, V43, P1157, DOI 10.1046/J.1528-1157.2002.12502.X
TRUE	12	0	2006	ORNOY A, 2006, REPROD TOXICOL, V22, P214, DOI 10.1016/J.REPROTOX.2006.03.014
TRUE	12	0	1999	RONEN GM, 1999, J PEDIATR-US, V134, P71, DOI 10.1016/S0022-3476(99)70374-4
TRUE	12	0	2008	ORNOY A, 2008, REPROD TOXICOL, V25, P388, DOI 10.1016/J.REPROTOX.2008.03.001
TRUE	11	0.01	2013	URIA-AVELLANAL C, 2013, SEMIN FETAL NEONAT M, V18, P224, DOI 10.1016/J.SINY.2013.01.002
TRUE	11	0	2007	SILVERSTEIN FS, 2007, ANN NEUROL, V62, P112, DOI 10.1002/ANA.21167
TRUE	11	0.01	2015	WEN XR, 2015, NEUROLOGY, V84, P944, DOI 10.1212/WNL.0000000000001304
TRUE	11	0	2012	FORCELLI PA, 2012, ANN NEUROL, V72, P363, DOI 10.1002/ANA.23600
TRUE	11	0	1999	CRAWFORD P, 1999, SEIZURE-EUR J EPILEP, V8, P135, DOI 10.1053/SEIZ.1999.0274
TRUE	11	0.01	2003	MONTOURIS G, 2003, EPILEPSY BEHAV, V4, P310, DOI 10.1016/S1525-5050(03)00110-0
TRUE	11	0.02	2010	TOMSON T, 2010, EPILEPSIA, V51, P909, DOI 10.1111/J.1528-1167.2010.02525.X
TRUE	11	0	2010	JENTINK J, 2010, BMJ-BRIT MED J, V341, P0, DOI 10.1136/BMJ.C6581
TRUE	11	0	2007	TOMSON T, 2007, BRIT MED J, V335, P769, DOI 10.1136/BMJ.39266.473113.BE
TRUE	11	0.01	1998	WALLACE H, 1998, LANCET, V352, P1970, DOI 10.1016/S0140-6736(98)04512-7
TRUE	11	0	2015	TOMSON T, 2015, NEUROLOGY, V85, P580, DOI 10.1212/WNL.0000000000001840
TRUE	11	0.02	2008	SILVERSTEIN FS, 2008, PEDIATR NEUROL, V39, P77, DOI 10.1016/J.PEDIATRNEUROL.2008.04.008
TRUE	11	0.02	1998	NEI M, 1998, NEUROLOGY, V51, P904, DOI 10.1212/WNL.51.3.904
TRUE	10	0.01	2012	PISANI F, 2012, PEDIATR RES, V72, P186, DOI 10.1038/PR.2012.66
TRUE	10	0	2005	MONTOURIS G, 2005, CURR MED RES OPIN, V21, P693, DOI 10.1185/030079905X43640
TRUE	10	0	2005	GLUCKMAN PD, 2005, LANCET, V365, P663, DOI 10.1016/S0140-6736(05)17946-X
TRUE	10	0.02	2007	KATZ I, 2007, J PHARMACOL EXP THER, V322, P494, DOI 10.1124/JPET.107.123133
TRUE	10	0	2000	MOORE SJ, 2000, J MED GENET, V37, P489, DOI 10.1136/JMG.37.7.489
TRUE	10	0	2008	STEFOVSKA VG, 2008, ANN NEUROL, V64, P434, DOI 10.1002/ANA.21463
TRUE	10	0	2005	SHANKARAN S, 2005, NEW ENGL J MED, V353, P1574, DOI 10.1056/NEJMCPS050929
TRUE	10	0	1999	PAINTER MJ, 1999, NEW ENGL J MED, V341, P485, DOI 10.1056/NEJM199908123410704
TRUE	10	0.01	2000	WIDE K, 2000, DEV MED CHILD NEUROL, V42, P87, DOI 10.1017/S0012162200000177
TRUE	10	0	2001	BEGHI E, 2001, EPILEPSIA, V42, P1422, DOI 10.1046/J.1528-1157.2001.11201.X
TRUE	10	0	1994	STEEGERSTHEUNISSEN RPM, 1994, EPILEPSY RES, V18, P261, DOI 10.1016/0920-1211(94)90046-9
TRUE	10	0	2010	VAJDA FJE, 2010, ACTA NEUROL SCAND, V121, P89, DOI 10.1111/J.1600-0404.2009.01260.X
TRUE	10	0	2009	MALONE A, 2009, EPILEPSIA, V50, P2097, DOI 10.1111/J.1528-1167.2009.02132.X
TRUE	10	0	2010	VAJDA FJE, 2010, EPILEPSIA, V51, P805, DOI 10.1111/J.1528-1167.2009.02336.X
TRUE	10	0	2012	THOMAS SV, 2012, EPILEPSIA, V53, P0, DOI 10.1111/J.1528-1167.2012.03439.X
TRUE	10	0	1998	MORRELL MJ, 1998, NEUROLOGY, V51, P0, DOI 10.1212/WNL.51.5_SUPPL_4.S21
TRUE	10	0.08	1994	LINDHOUT D, 1994, EPILEPSIA, V35, P0, DOI 10.1111/J.1528-1157.1994.TB05952.X
TRUE	10	0	2015	TOMSON T, 2015, SEIZURE-EUR J EPILEP, V28, P46, DOI 10.1016/J.SEIZURE.2015.02.019
TRUE	9	0	2004	RENNIE JM, 2004, ARCH DIS CHILD, V89, P0, DOI 10.1136/FN.89.1.F37
TRUE	9	0.01	2007	HERNANDEZ-DIAZ S, 2007, BIRTH DEFECTS RES A, V79, P357
TRUE	9	0.1	2009	VINTEN J, 2009, EPILEPSY BEHAV, V14, P197, DOI 10.1016/J.YEBEH.2008.10.011
TRUE	9	0.01	2007	KIM J, 2007, J PHARMACOL EXP THER, V323, P165, DOI 10.1124/JPET.107.126250
TRUE	9	0	2002	BOYLAN GB, 2002, ARCH DIS CHILD, V86, P165
TRUE	9	0	2013	ARTAMA M, 2013, DRUG SAFETY, V36, P359, DOI 10.1007/S40264-013-0052-8
TRUE	9	0	2001	THOMAS SV, 2001, NEUROL INDIA, V49, P60
TRUE	9	0.02	1997	HERZOG AG, 1997, EPILEPSIA, V38, P1082, DOI 10.1111/J.1528-1157.1997.TB01197.X
TRUE	9	0	2010	VAJDA FJE, 2010, SEIZURE-EUR J EPILEP, V19, P558, DOI 10.1016/J.SEIZURE.2010.07.019
TRUE	9	0	1997	RAMBECK B, 1997, EUR J CLIN PHARMACOL, V51, P481, DOI 10.1007/S002280050234
TRUE	9	0	2007	THOMAS SV, 2007, EPILEPSIA, V48, P2234
TRUE	9	0	2013	VAJDA FJE, 2013, EPILEPSIA, V54, P181, DOI 10.1111/J.1528-1167.2012.03625.X
TRUE	9	0.03	1999	CRAIG J, 1999, SEIZURE-EUR J EPILEP, V8, P253, DOI 10.1053/SEIZ.1999.0283
TRUE	9	0.04	1996	KRAUSS GL, 1996, NEUROLOGY, V46, P1534, DOI 10.1212/WNL.46.6.1534
TRUE	9	0	2009	SABERS A, 2009, CURR OPIN NEUROL, V22, P157, DOI 10.1097/WCO.0B013E32832923D7
TRUE	9	0	2012	WLODARCZYK BJ, 2012, AM J MED GENET A, V158A, P2071, DOI 10.1002/AJMG.A.35438
TRUE	9	0	2015	PRESSLER RM, 2015, LANCET NEUROL, V14, P469, DOI 10.1016/S1474-4422(14)70303-5
TRUE	9	0.02	2008	OHMAN I, 2008, SEIZURE-EUR J EPILEP, V17, P199, DOI 10.1016/J.SEIZURE.2007.11.017
TRUE	9	0	2005	TOMSON T, 2005, THER DRUG MONIT, V27, P718, DOI 10.1097/01.FTD.0000179843.63515.8F
TRUE	8	0	1996	WELLS PG, 1996, CRIT REV BIOCHEM MOL, V31, P1, DOI 10.3109/10409239609110574
TRUE	8	0.01	2011	ABEND NS, 2011, J CHILD NEUROL, V26, P465, DOI 10.1177/0883073810384263
TRUE	8	0.02	1997	JICK SS, 1997, PHARMACOTHERAPY, V17, P561
TRUE	8	0.03	1998	ISOJARVI JIT, 1998, ANN NEUROL, V43, P446, DOI 10.1002/ANA.410430406
TRUE	8	0	2013	COHEN MJ, 2013, EPILEPSY BEHAV, V29, P308, DOI 10.1016/J.YEBEH.2013.08.001
TRUE	8	0	2010	EDWARDS AD, 2010, BMJ-BRIT MED J, V340, P0, DOI 10.1136/BMJ.C363
TRUE	8	0.01	1997	PARENT JM, 1997, J NEUROSCI, V17, P3727
TRUE	8	0.02	2009	ACKERS R, 2009, ARCH DIS CHILD, V94, P443, DOI 10.1136/ADC.2008.144386
TRUE	8	0	1997	DANIELSSON BR, 1997, TERATOLOGY, V56, P271, DOI 10.1002/(SICI)1096-9926(199710)56:43.0.CO;2-1
TRUE	8	0.01	1997	HOLMES GL, 1997, EPILEPSIA, V38, P12, DOI 10.1111/J.1528-1157.1997.TB01074.X
TRUE	8	0	2011	KIM KC, 2011, TOXICOL LETT, V201, P137, DOI 10.1016/J.TOXLET.2010.12.018
TRUE	8	0	1998	AZARBAYJANI F, 1998, TERATOLOGY, V57, P117, DOI 10.1002/(SICI)1096-9926(199803)57:33.0.CO;2-Y
TRUE	8	0	1992	LINDHOUT D, 1992, NEUROLOGY, V42, P94
TRUE	8	0.01	2005	SCHNEIDER T, 2005, NEUROPSYCHOPHARMACOL, V30, P80, DOI 10.1038/SJ.NPP.1300518
TRUE	8	0	2017	RAZAZ N, 2017, JAMA NEUROL, V74, P983, DOI 10.1001/JAMANEUROL.2017.1310
TRUE	8	0	2015	WOOD AG, 2015, EPILEPSIA, V56, P1047, DOI 10.1111/EPI.13007
TRUE	7	0	2003	YERBY MS, 2003, NEUROLOGY, V61, P0, DOI 10.1212/WNL.61.6_SUPPL_2.S23
TRUE	7	0.02	1997	WASTERLAIN CG, 1997, EPILEPSIA, V38, P728, DOI 10.1111/J.1528-1157.1997.TB01244.X
TRUE	7	0	2010	HILL DS, 2010, EXPERT REV NEUROTHER, V10, P943, DOI 10.1586/ERN.10.57
TRUE	7	0	2002	PALMIERI C, 2002, CNS DRUGS, V16, P755, DOI 10.2165/00023210-200216110-00004
TRUE	7	0	2004	RUSSELL AJC, 2004, EPILEPSIA, V45, P1467, DOI 10.1111/J.0013-9580.2004.451104.X
TRUE	7	0	1996	KONDO T, 1996, EPILEPSIA, V37, P1242, DOI 10.1111/J.1528-1157.1996.TB00560.X
TRUE	7	0	2002	CRAWFORD P, 2002, CNS DRUGS, V16, P263, DOI 10.2165/00023210-200216040-00005
TRUE	7	0.01	1995	CLAYTONSMITH J, 1995, J MED GENET, V32, P724, DOI 10.1136/JMG.32.9.724
TRUE	7	0	2000	YERBY MS, 2000, NEUROLOGY, V55, P0
TRUE	7	0	2012	HOLMES LB, 2012, BIRTH DEFECTS RES A, V94, P599, DOI 10.1002/BDRA.23028
TRUE	7	0	1998	YERBY MS, 1998, EPILEPSIA, V39, P793
TRUE	7	0	2017	SCHEFFER IE, 2017, EPILEPSIA, V58, P512, DOI 10.1111/EPI.13709
TRUE	7	0	2016	PISANI F, 2016, EUR J PAEDIATR NEURO, V20, P243, DOI 10.1016/J.EJPN.2015.12.007
TRUE	7	0	2003	PENNELL PB, 2003, NEUROLOGY, V60, P0, DOI 10.1212/WNL.60.11_SUPPL_4.S31
TRUE	7	0.07	1996	BENNETT GD, 1996, J PHARMACOL EXP THER, V279, P1237
TRUE	7	0	2014	VAJDA FJE, 2014, ACTA NEUROL SCAND, V130, P234, DOI 10.1111/ANE.12280
TRUE	7	0.01	1999	BATTINO D, 1999, EPILEPSY RES, V36, P53, DOI 10.1016/S0920-1211(99)00020-0
TRUE	7	0	2016	WESTON J, 2016, COCHRANE DB SYST REV, V11, P0
TRUE	7	0	1996	ISOJARVI JIT, 1996, ANN NEUROL, V39, P579, DOI 10.1002/ANA.410390506
TRUE	7	0	2007	BARTHA AI, 2007, PEDIATR NEUROL, V37, P85, DOI 10.1016/J.PEDIATRNEUROL.2007.04.003
TRUE	7	0.01	2013	KATAOKA S, 2013, INT J NEUROPSYCHOPH, V16, P91, DOI 10.1017/S1461145711001714
TRUE	7	0	2008	DEBURCHGRAEVE W, 2008, CLIN NEUROPHYSIOL, V119, P2447, DOI 10.1016/J.CLINPH.2008.07.281
TRUE	6	0	2009	FILIPPI L, 2009, EPILEPSIA, V50, P2355, DOI 10.1111/J.1528-1167.2009.02302.X
TRUE	6	0	2009	BATTINO D, 2009, EPILEPSIA, V50, P2305, DOI 10.1111/J.1528-1167.2009.02093.X
TRUE	6	0.02	1994	SCHUPF N, 1994, EPILEPSIA, V35, P750, DOI 10.1111/J.1528-1157.1994.TB02506.X
TRUE	6	0	2015	TOMSON T, 2015, NEUROLOGY, V85, P866, DOI 10.1212/WNL.0000000000001772
TRUE	6	0	2002	COWAN LD, 2002, MENT RETARD DEV D R, V8, P171, DOI 10.1002/MRDD.10035
TRUE	6	0.01	1997	LEONARD G, 1997, EPILEPSIA, V38, P170
TRUE	6	0	2014	LUCCHINA L, 2014, AUTISM RES, V7, P273, DOI 10.1002/AUR.1338
TRUE	6	0	2016	KHAROSHANKAYA L, 2016, DEV MED CHILD NEUROL, V58, P1242, DOI 10.1111/DMCN.13215
TRUE	6	0	2012	LYNCH NE, 2012, EPILEPSIA, V53, P549, DOI 10.1111/J.1528-1167.2011.03401.X
TRUE	6	0	2001	MIZRAHI E, 2001, EPILEPSIA, V42, P102
TRUE	6	0	2002	CELKA P, 2002, IEEE T BIO-MED ENG, V49, P455, DOI 10.1109/10.995684
TRUE	6	0.01	2003	LONG L, 2003, EPILEPSY BEHAV, V4, P447, DOI 10.1016/S1525-5050(03)00122-7
TRUE	6	0	2014	BECH BH, 2014, BMJ-BRIT MED J, V349, P0, DOI 10.1136/BMJ.G5159
TRUE	6	0	2011	KHAN O, 2011, PEDIATR NEUROL, V44, P265, DOI 10.1016/J.PEDIATRNEUROL.2010.11.005
TRUE	6	0	2017	VERONIKI AA, 2017, BMC MED, V15, P0, DOI 10.1186/S12916-017-0845-1
TRUE	6	0	2000	KWAN P, 2000, NEW ENGL J MED, V342, P314, DOI 10.1056/NEJM200002033420503
TRUE	6	0	2004	PENNELL PB, 2004, NEUROL CLIN, V22, P799, DOI 10.1016/J.NCL.2004.07.004
TRUE	6	0	2005	OHMAN I, 2005, EPILEPSIA, V46, P1621, DOI 10.1111/J.1528-1167.2005.00251.X
TRUE	6	0	2000	BAUER J, 2000, EPILEPSY RES, V41, P163, DOI 10.1016/S0920-1211(00)00139-X
TRUE	6	0	1993	ISOJARVI JIT, 1993, NEW ENGL J MED, V329, P1383, DOI 10.1056/NEJM199311043291904
TRUE	6	0.02	1994	DRISLANE FW, 1994, NEUROLOGY, V44, P306, DOI 10.1212/WNL.44.2.306
TRUE	6	0	2014	KILIC D, 2014, EPILEPSIA, V55, P1714, DOI 10.1111/EPI.12758
TRUE	6	0	1995	DANIELSSON BR, 1995, TERATOLOGY, V52, P252, DOI 10.1002/TERA.1420520503
TRUE	6	0	2004	HOLMES LB, 2004, EPILEPSIA, V45, P1465, DOI 10.1111/J.0013-9580.2004.451102.X
TRUE	6	0	2010	BORTHEN I, 2010, BJOG-INT J OBSTET GY, V117, P1537, DOI 10.1111/J.1471-0528.2010.02694.X
TRUE	6	0	2011	WUSTHOFF CJ, 2011, J CHILD NEUROL, V26, P724, DOI 10.1177/0883073810390036
TRUE	6	0	2000	HAGG S, 2000, DRUG SAFETY, V22, P425, DOI 10.2165/00002018-200022060-00002
TRUE	6	0.02	1995	LANSKA MJ, 1995, NEUROLOGY, V45, P724, DOI 10.1212/WNL.45.4.724
TRUE	6	0	2008	NICOLA J, 2008, J NEUROL SCI, V271, P1, DOI 10.1016/J.JNS.2008.03.004
TRUE	6	0	2013	ROULLET FI, 2013, NEUROTOXICOL TERATOL, V36, P47, DOI 10.1016/J.NTT.2013.01.004
TRUE	6	0	2001	LASKOWSKA M, 2001, GYNECOL OBSTET INVES, V51, P99, DOI 10.1159/000052902
TRUE	6	0	1996	MORRELL MJ, 1996, EPILEPSIA, V37, P0, DOI 10.1111/J.1528-1157.1996.TB06037.X
TRUE	6	0	2014	MEADOR KJ, 2014, JAMA PEDIATR, V168, P729, DOI 10.1001/JAMAPEDIATRICS.2014.118
TRUE	6	0	2013	REITER SF, 2013, EPILEPSY BEHAV, V29, P379, DOI 10.1016/J.YEBEH.2013.08.016
TRUE	6	0	2004	VAJDA F, 2004, EPILEPSIA, V45, P1466, DOI 10.1111/J.0013-9580.2004.451103.X
TRUE	6	0	2007	HIRTZ D, 2007, NEUROLOGY, V68, P326, DOI 10.1212/01.WNL.0000252807.38124.A3
TRUE	6	0	2013	VASUDEVAN C, 2013, SEMIN FETAL NEONAT M, V18, P185, DOI 10.1016/J.SINY.2013.05.008
TRUE	6	0	2011	GLASS HC, 2011, PEDIATR NEUROL, V44, P439, DOI 10.1016/J.PEDIATRNEUROL.2011.01.006
TRUE	6	0	2001	DUNCAN S, 2001, EPILEPSIA, V42, P750, DOI 10.1046/J.1528-1157.2001.44300.X
TRUE	5	0	2005	FAUL S, 2005, CLIN NEUROPHYSIOL, V116, P1533, DOI 10.1016/J.CLINPH.2005.03.006
TRUE	5	0	1998	ERIKSSON PS, 1998, NAT MED, V4, P1313, DOI 10.1038/3305
TRUE	5	0.01	1995	HERZOG AG, 1995, NEUROLOGY, V45, P1660, DOI 10.1212/WNL.45.9.1660
TRUE	5	0	2008	TITZE K, 2008, DEV MED CHILD NEUROL, V50, P117, DOI 10.1111/J.1469-8749.2007.02020.X
TRUE	5	0	1998	SEALE CG, 1998, NEUROLOGY, V51, P1039, DOI 10.1212/WNL.51.4.1039
TRUE	5	0	2018	BJORK M, 2018, JAMA NEUROL, V75, P160, DOI 10.1001/JAMANEUROL.2017.3897
TRUE	5	0	2005	REIMERS A, 2005, EPILEPSIA, V46, P1414, DOI 10.1111/J.1528-1167.2005.10105.X
TRUE	5	0	2016	MEADOR KJ, 2016, NEUROLOGY, V86, P297, DOI 10.1212/WNL.0000000000002119
TRUE	5	0	2016	FOX CK, 2016, NEUROLOGY, V86, P2179, DOI 10.1212/WNL.0000000000002739
TRUE	5	0	2011	RAMANTANI G, 2011, EUR J PAEDIATR NEURO, V15, P1, DOI 10.1016/J.EJPN.2010.10.003
TRUE	5	0	1999	BOYLAN GB, 1999, ARCH DIS CHILD, V80, P0, DOI 10.1136/FN.80.2.F105
TRUE	5	0	2009	AZZOPARDI DV, 2009, NEW ENGL J MED, V361, P1349, DOI 10.1056/NEJMOA0900854
TRUE	5	0	2005	RASALAM AD, 2005, DEV MED CHILD NEUROL, V47, P551, DOI 10.1017/S0012162205001076
TRUE	5	0	2008	SUN Y, 2008, PEDIATRICS, V121, P0, DOI 10.1542/PEDS.2007-2316
TRUE	5	0	1992	BATTINO D, 1992, ACTA NEUROL SCAND, V85, P204
TRUE	5	0	2012	VAN DEN B, 2012, CLIN PHARMACOKINET, V51, P671, DOI 10.1007/S40262-012-0004-Y
TRUE	5	0	1997	SCHUPF N, 1997, EPILEPSIA, V38, P824, DOI 10.1111/J.1528-1157.1997.TB01470.X
TRUE	5	0.01	2005	GURVICH N, 2005, FASEB J, V19, P1166, DOI 10.1096/FJ.04-3425FJE
TRUE	5	0	2013	CAMPBELL E, 2013, EPILEPSIA, V54, P165, DOI 10.1111/EPI.12001
TRUE	5	0	1998	KLEIN P, 1998, EPILEPSIA, V39, P0, DOI 10.1111/J.1528-1157.1998.TB02602.X
TRUE	5	0	2003	MORRELL MJ, 2003, EPILEPSIA, V44, P11, DOI 10.1046/J.1528-1157.44.S4.2.X
TRUE	5	0	2001	DIAV-CITRIN O, 2001, NEUROLOGY, V57, P321, DOI 10.1212/WNL.57.2.321
TRUE	5	0	2005	TOMSON T, 2005, CURR OPIN NEUROL, V18, P135, DOI 10.1097/01.WCO.0000162854.67767.06
TRUE	5	0	2009	BLUME HK, 2009, J CHILD NEUROL, V24, P148, DOI 10.1177/0883073808321056
TRUE	5	0	2005	JOHANNESSEN SI, 2005, EPILEPSIA, V46, P775, DOI 10.1111/J.1528-1167.2005.54804.X
TRUE	5	0	2014	GLASS HC, 2014, NEUROLOGY, V82, P1239, DOI 10.1212/WNL.0000000000000282
TRUE	5	0	2007	CHRISTENSEN J, 2007, EPILEPSIA, V48, P484, DOI 10.1111/J.1528-1167.2007.00997.X
TRUE	5	0	2016	PATEL SI, 2016, THER ADV NEUROL DISO, V9, P118, DOI 10.1177/1756285615623934
TRUE	5	0	2000	PERUCCA E, 2000, CLIN PHARMACOKINET, V38, P191, DOI 10.2165/00003088-200038030-00001
TRUE	5	0	2014	VAJDA FJE, 2014, J CLIN NEUROSCI, V21, P1478, DOI 10.1016/J.JOCN.2013.11.049
TRUE	5	0	2009	JENSEN FE, 2009, CLIN PERINATOL, V36, P881, DOI 10.1016/J.CLP.2009.08.001
TRUE	5	0	2011	MERHAR SL, 2011, J PEDIATR-US, V159, P152, DOI 10.1016/J.JPEDS.2011.03.057
TRUE	5	0	2014	VAJDA FJE, 2014, EPILEPSIA, V55, P1229, DOI 10.1111/EPI.12711
TRUE	5	0	1999	IKONOMIDOU C, 1999, SCIENCE, V283, P70, DOI 10.1126/SCIENCE.283.5398.70
TRUE	5	0	2014	VESOULIS ZA, 2014, PEDIATR RES, V75, P564, DOI 10.1038/PR.2013.245
TRUE	5	0	2006	TOMSON T, 2006, NEUROLOGY, V67, P1297, DOI 10.1212/01.WNL.0000238522.79277.9C
TRUE	5	0	2010	IKONOMIDOU C, 2010, EPILEPSY RES, V88, P11, DOI 10.1016/J.EPLEPSYRES.2009.09.019
TRUE	5	0	2012	BOBO WV, 2012, PAEDIATR PERINAT EP, V26, P578, DOI 10.1111/PPE.12004
TRUE	5	0	1997	GOTMAN J, 1997, ELECTROEN CLIN NEURO, V103, P356, DOI 10.1016/S0013-4694(97)00003-9
TRUE	5	0	2000	SCHARFMAN HE, 2000, J NEUROSCI, V20, P6144, DOI 10.1523/JNEUROSCI.20-16-06144.2000
TRUE	5	0.03	1997	BENNETT GD, 1997, EPILEPSIA, V38, P415, DOI 10.1111/J.1528-1157.1997.TB01730.X
TRUE	5	0	1992	BATTINO D, 1992, ACTA NEUROL SCAND, V86, P555, DOI 10.1111/J.1600-0404.1992.TB05485.X
TRUE	5	0	2013	BOYLAN GB, 2013, SEMIN FETAL NEONAT M, V18, P202, DOI 10.1016/J.SINY.2013.04.004
TRUE	5	0	1993	SCHER MS, 1993, PEDIATRICS, V91, P128
TRUE	5	0	2002	COSSETTE P, 2002, NAT GENET, V31, P184, DOI 10.1038/NG885
TRUE	5	0	2008	SCHNEIDER T, 2008, PSYCHONEUROENDOCRINO, V33, P728, DOI 10.1016/J.PSYNEUEN.2008.02.011
TRUE	5	0.01	2000	WIDE K, 2000, EPILEPSIA, V41, P854, DOI 10.1111/J.1528-1157.2000.TB00253.X
TRUE	5	0	1999	NULMAN L, 1999, DRUGS, V57, P535, DOI 10.2165/00003495-199957040-00006
TRUE	5	0	2015	BJORK MH, 2015, EPILEPSIA, V56, P28, DOI 10.1111/EPI.12884
TRUE	5	0.01	2007	MANENT JB, 2007, EPILEPSIA, V48, P684, DOI 10.1111/J.1528-1167.2007.01056.X
TRUE	5	0	2000	LU MCK, 2000, TERATOLOGY, V61, P277, DOI 10.1002/(SICI)1096-9926(200004)61:43.0.CO;2-W
TRUE	5	0	1996	KOCH S, 1996, ACTA PAEDIATR, V85, P739, DOI 10.1111/J.1651-2227.1996.TB14137.X
TRUE	5	0	2006	HARDEN CL, 2006, EPILEPSIA, V47, P1447, DOI 10.1111/J.1528-1167.2006.00507.X
TRUE	5	0	2001	MYLLYNEN P, 2001, EPILEPSIA, V42, P1482, DOI 10.1046/J.1528-1157.2001.14301.X
TRUE	5	0	2017	THOMAS SV, 2017, EPILEPSIA, V58, P274, DOI 10.1111/EPI.13632
TRUE	5	0	2001	MCCABE BK, 2001, J NEUROSCI, V21, P2094, DOI 10.1523/JNEUROSCI.21-06-02094.2001
TRUE	5	0	2010	FURWENTSCHES A, 2010, SEIZURE-EUR J EPILEP, V19, P185, DOI 10.1016/J.SEIZURE.2010.01.003
TRUE	5	0	1994	HOLMES LB, 1994, TERATOLOGY, V49, P202, DOI 10.1002/TERA.1420490316
TRUE	5	0	1997	MACKAY FJ, 1997, EPILEPSIA, V38, P881, DOI 10.1111/J.1528-1157.1997.TB01252.X
TRUE	5	0	1997	MURIALDO G, 1997, J ENDOCRINOL INVEST, V20, P519, DOI 10.1007/BF03348013
TRUE	5	0	1994	TOMSON T, 1994, EPILEPSIA, V35, P122, DOI 10.1111/J.1528-1157.1994.TB02921.X
TRUE	5	0	2011	LYNGE E, 2011, SCAND J PUBLIC HEALT, V39, P30, DOI 10.1177/1403494811401482
TRUE	4	0	1999	MIZRAHI EM, 1999, EPILEPSIA, V40, P0, DOI 10.1111/J.1528-1157.1999.TB00878.X
TRUE	4	0	1998	SWARTJES JM, 1998, EUR J OBSTET GYN R B, V79, P3, DOI 10.1016/S0301-2115(98)00027-X
TRUE	4	0	2002	TETTENBORN B, 2002, EPILEPTIC DISORD, V4, P0
TRUE	4	0	2011	NASH KB, 2011, NEUROLOGY, V76, P556, DOI 10.1212/WNL.0B013E31820AF91A
TRUE	4	0	2004	MILLER SP, 2004, AM J OBSTET GYNECOL, V190, P93, DOI 10.1016/S0002-9378(03)00908-6
TRUE	4	0	2015	FARMEN AH, 2015, SEIZURE-EUR J EPILEP, V28, P76, DOI 10.1016/J.SEIZURE.2015.02.026
TRUE	4	0	2003	MAY TW, 2003, CLIN PHARMACOKINET, V42, P1023, DOI 10.2165/00003088-200342120-00002
TRUE	4	0	2014	SABERS A, 2014, NEUROSCI LETT, V580, P12, DOI 10.1016/J.NEULET.2014.07.036
TRUE	4	0	1992	OMTZIGT JGC, 1992, NEUROLOGY, V42, P119
TRUE	4	0	1998	FRANASZCZUK PJ, 1998, ELECTROEN CLIN NEURO, V106, P513, DOI 10.1016/S0013-4694(98)00024-8
TRUE	4	0	2003	RENNIE JM, 2003, CURR OPIN NEUROL, V16, P177, DOI 10.1097/01.WCO.0000063768.15877.23
TRUE	4	0.01	2008	WESTIN AA, 2008, SEIZURE-EUR J EPILEP, V17, P192, DOI 10.1016/J.SEIZURE.2007.11.027
TRUE	4	0	1999	HARDEN CL, 1999, EPILEPSIA, V40, P1402, DOI 10.1111/J.1528-1157.1999.TB02012.X
TRUE	4	0	2011	THURMAN DJ, 2011, EPILEPSIA, V52, P2, DOI 10.1111/J.1528-1167.2011.03121.X
TRUE	4	0	2009	THOMAS SV, 2009, SEIZURE-EUR J EPILEP, V18, P163, DOI 10.1016/J.SEIZURE.2008.08.010
TRUE	4	0	2002	FINNELL RH, 2002, ANNU REV PHARMACOL, V42, P181, DOI 10.1146/ANNUREV.PHARMTOX.42.083001.110955
TRUE	4	0	2010	BIAN GW, 2010, PLOS PATHOG, V6, P0, DOI 10.1371/JOURNAL.PPAT.1000833
TRUE	4	0	2004	MORROW JI, 2004, EPILEPSIA, V45, P57
TRUE	4	0	2014	BROMLEY R, 2014, COCHRANE DB SYST REV, V10, P0, DOI DOI 10.1002/14651858
TRUE	4	0	2000	MORRELL MJ, 2000, J WOMEN HEALTH GEN-B, V9, P959, DOI 10.1089/15246090050199982
TRUE	4	0	2000	GIBBS JW, 2000, EPILEPSIA, V41, P0
TRUE	4	0	2015	BOYLAN GB, 2015, SEMIN FETAL NEONAT M, V20, P103, DOI 10.1016/J.SINY.2015.01.001
TRUE	4	0	2016	GERARD EE, 2016, CONTINUUM (MINNEAP MINN), V22, P204, DOI 10.1212/CON.0000000000000270
TRUE	4	0	1997	JALAVA M, 1997, EPILEPSIA, V38, P532, DOI 10.1111/J.1528-1157.1997.TB01137.X
TRUE	4	0	2008	SUN Y, 2008, AM J EPIDEMIOL, V167, P262, DOI 10.1093/AJE/KWM316
TRUE	4	0	2015	CHO KO, 2015, NAT COMMUN, V6, P0, DOI 10.1038/NCOMMS7606
TRUE	4	0	2004	ARTAMA M, 2004, AM J EPIDEMIOL, V159, P1057, DOI 10.1093/AJE/KWH140
TRUE	4	0	1996	SCHUPF N, 1996, EPILEPSIA, V37, P833, DOI 10.1111/J.1528-1157.1996.TB00035.X
TRUE	4	0	2009	MOREIRA LA, 2009, CELL, V139, P1268, DOI 10.1016/J.CELL.2009.11.042
TRUE	4	0	2001	BITON V, 2001, NEUROLOGY, V56, P172, DOI 10.1212/WNL.56.2.172
TRUE	4	0	2000	INGRAM JL, 2000, NEUROTOXICOL TERATOL, V22, P319, DOI 10.1016/S0892-0362(99)00083-5
TRUE	4	0	1995	VOLPE JJ, 1995, NEUROLOGY NEWBORN, V0, P172
TRUE	4	0	2003	SCHER MS, 2003, PEDIATR NEUROL, V29, P381, DOI 10.1016/S0887-8994(03)00399-0
TRUE	4	0.07	1996	MORRELL MJ, 1996, EPILEPSIA, V37, P1204, DOI 10.1111/J.1528-1157.1996.TB00554.X
TRUE	4	0	2015	CARRASCO M, 2015, PEDIATR NEUROL, V53, P445, DOI 10.1016/J.PEDIATRNEUROL.2015.06.023
TRUE	4	0	2003	MORROW JI, 2003, EXPERT OPIN PHARMACO, V4, P445, DOI 10.1517/14656566.4.4.445
TRUE	4	0	2015	VELEZ-RUIZ NJ, 2015, DRUG SAFETY, V38, P271, DOI 10.1007/S40264-015-0269-9
TRUE	4	0	2016	BROMLEY RL, 2016, NEUROLOGY, V87, P1943, DOI 10.1212/WNL.0000000000003157
TRUE	4	0	2013	VAJDA FJ, 2013, NEUROLOGY, V81, P999, DOI 10.1212/WNL.0B013E3182A43E81
TRUE	4	0	1999	TOET MC, 1999, ARCH DIS CHILD, V81, P0, DOI 10.1136/FN.81.1.F19
TRUE	4	0	1999	HUANG LT, 1999, DEV BRAIN RES, V118, P99, DOI 10.1016/S0165-3806(99)00135-2
TRUE	4	0	2012	SHARPE CM, 2012, PEDIATR RES, V72, P43, DOI 10.1038/PR.2012.51
TRUE	4	0	2011	MURPHY BL, 2011, J NEUROSCI, V31, P105, DOI 10.1523/JNEUROSCI.2728-10.2011
TRUE	4	0	1997	GOTMAN J, 1997, ELECTROEN CLIN NEURO, V103, P363, DOI 10.1016/S0013-4694(97)00005-2
TRUE	4	0.01	2005	MENEGOLA E, 2005, BIRTH DEFECTS RES B, V74, P392, DOI 10.1002/BDRB.2005
TRUE	4	0	1994	CHRISTIANSON AL, 1994, DEV MED CHILD NEUROL, V36, P361
TRUE	4	0	2002	CRAWFORD P, 2002, SEIZURE, V11 SUPPL A, P212
TRUE	4	0	1994	WATERS CH, 1994, ARCH NEUROL-CHICAGO, V51, P250, DOI 10.1001/ARCHNEUR.1994.00540150044014
TRUE	4	0.01	2009	GLASS HC, 2009, J PEDIATR-US, V154, P24, DOI 10.1016/J.JPEDS.2008.07.008
TRUE	4	0	2006	KARAYIANNIS NB, 2006, SOFT COMPUT, V10, P382, DOI 10.1007/S00500-005-0498-4
TRUE	4	0	1998	ZHOU WG, 1998, P ROY SOC B-BIOL SCI, V265, P509, DOI 10.1098/RSPB.1998.0324
TRUE	4	0	1992	LINDHOUT D, 1992, NEUROLOGY, V42, P111
TRUE	4	0	1993	DUNCAN S, 1993, EPILEPSIA, V34, P827, DOI 10.1111/J.1528-1157.1993.TB02097.X
TRUE	4	0	2005	KARAYIANNIS NB, 2005, EPILEPSIA, V46, P901, DOI 10.1111/J.1528-1167.2005.56504.X
TRUE	4	0	2008	KLUGER BM, 2008, SEMIN NEUROL, V28, P328, DOI 10.1055/S-2008-1079337
TRUE	4	0	1994	KALLEN AJB, 1994, REPROD TOXICOL, V8, P203
TRUE	4	0	2015	SVEBERG L, 2015, SEIZURE-EUR J EPILEP, V28, P35, DOI 10.1016/J.SEIZURE.2015.02.020
TRUE	4	0	2013	KIM KC, 2013, J NEUROCHEM, V124, P832, DOI 10.1111/JNC.12147
TRUE	4	0	2014	HERNANDEZ-DIAZ S, 2014, OBSTET GYNECOL, V123, P21, DOI 10.1097/AOG.0000000000000018
TRUE	4	0	2004	MEADOR KJ, 2004, CLEVE CLIN J MED, V71 SUPPL 2, P0
TRUE	4	0	2012	GREEN MW, 2012, HEADACHE, V52, P1070, DOI 10.1111/J.1526-4610.2012.02190.X
TRUE	4	0	1992	OMTZIGT JGC, 1992, PRENATAL DIAG, V12, P893, DOI 10.1002/PD.1970121107
TRUE	4	0.01	1994	STEINHAUSEN HC, 1994, ACTA PAEDIATR, V83, P955, DOI 10.1111/J.1651-2227.1994.TB13180.X
TRUE	4	0	2015	PAVLIDIS E, 2015, EUR J PAEDIATR NEURO, V19, P314, DOI 10.1016/J.EJPN.2015.01.002
TRUE	4	0	2015	VEIBY G, 2015, SEIZURE-EUR J EPILEP, V28, P57, DOI 10.1016/J.SEIZURE.2015.02.013
TRUE	4	0	2013	TSUCHIDA TN, 2013, J CLIN NEUROPHYSIOL, V30, P161, DOI 10.1097/WNP.0B013E3182872B24
TRUE	4	0	1999	THORP JA, 1999, AM J PERINAT, V16, P51, DOI 10.1055/S-2007-993836
TRUE	4	0	1998	CHARLIER C, 1998, NAT GENET, V18, P53, DOI 10.1038/NG0198-53
TRUE	4	0	2013	DAVANZO R, 2013, ITAL J PEDIATR, V39, P0, DOI 10.1186/1824-7288-39-50
TRUE	4	0	1995	HOWE AM, 1995, AM J MED GENET, V58, P238, DOI 10.1002/AJMG.1320580309
TRUE	4	0	2009	LIN HL, 2009, J NEUROL, V256, P1742, DOI 10.1007/S00415-009-5222-3
TRUE	4	0	2010	BARKS JD, 2010, PEDIATR RES, V67, P532, DOI 10.1203/PDR.0B013E3181D4FF4D
TRUE	4	0	2010	HERNANDEZ-DIAZ S, 2010, BIRTH DEFECTS RES A, V88, P408
TRUE	4	0	2001	AZARBAYJANI F, 2001, TERATOLOGY, V63, P152, DOI 10.1002/TERA.1026
TRUE	4	0	2005	MILLER SP, 2005, J PEDIATR-US, V146, P453, DOI 10.1016/J.JPEDS.2004.12.026
TRUE	4	0	2008	DZHALA VI, 2008, ANN NEUROL, V63, P222, DOI 10.1002/ANA.21229
TRUE	4	0	2000	SATHANANDAR ST, 2000, EPILEPSIA, V41, P246
TRUE	4	0	2012	SHANKARAN S, 2012, NEW ENGL J MED, V366, P2085, DOI 10.1056/NEJMOA1112066
TRUE	4	0	2009	OHMAN I, 2009, EPILEPSY RES, V87, P124, DOI 10.1016/J.EPLEPSYRES.2009.08.004
TRUE	4	0	1998	OLAFSSON E, 1998, NEUROLOGY, V51, P71, DOI 10.1212/WNL.51.1.71
TRUE	4	0	2009	WESTIN AA, 2009, EPILEPSIA, V50, P480, DOI 10.1111/J.1528-1167.2008.01776.X
TRUE	4	0	2007	JESSBERGER S, 2007, J NEUROSCI, V27, P5967, DOI 10.1523/JNEUROSCI.0110-07.2007
TRUE	4	0	1998	GREENBERG MK, 1998, EPILEPSIA, V39, P1226
TRUE	4	0	2013	VAN ROOIJ L, 2013, SEMIN FETAL NEONAT M, V18, P209, DOI 10.1016/J.SINY.2013.01.001
TRUE	4	0	2006	PARENT JM, 2006, ANN NEUROL, V59, P81, DOI 10.1002/ANA.20699
TRUE	4	0	1997	HOFFMANN AA, 1997, INFLUENTIAL PASSENGERS, V0, P42
TRUE	4	0	1998	SUTCLIFFE AG, 1998, OPHTHALMIC GENET, V19, P59, DOI 10.1076/OPGE.19.2.59.2321
TRUE	4	0	2006	WHITEHEAD E, 2006, PEDIATRICS, V117, P1298, DOI 10.1542/PEDS.2005-1660
TRUE	4	0.03	1998	RADATZ M, 1998, EPILEPSY RES, V30, P41, DOI 10.1016/S0920-1211(97)00095-8
TRUE	4	0	2008	PITTSCHIELER S, 2008, J NEUROL, V255, P1926, DOI 10.1007/S00415-008-0029-1
TRUE	4	0	2000	BENNETT GD, 2000, REPROD TOXICOL, V14, P1, DOI 10.1016/S0890-6238(99)00064-7
TRUE	3	0	1997	CAMFIELD PR, 1997, EPILEPSIA, V38, P735, DOI 10.1111/J.1528-1157.1997.TB01245.X
TRUE	3	0	2000	FAIELLA A, 2000, HUM MOL GENET, V9, P227, DOI 10.1093/HMG/9.2.227
TRUE	3	0	2006	NAVAKATIKYAN MA, 2006, CLIN NEUROPHYSIOL, V117, P1190, DOI 10.1016/J.CLINPH.2006.02.016
TRUE	3	0	2008	MORRELL MJ, 2008, ANN NEUROL, V64, P200, DOI 10.1002/ANA.21411
TRUE	3	0	2001	ANDERMANN F, 2001, EPILEPSIA, V42, P317, DOI 10.1046/J.1528-1157.2001.36400.X
TRUE	3	0	1996	RUSSELL AJC, 1996, SEIZURE, V5, P271
TRUE	3	0	2006	CLANCY RR, 2006, PEDIATRICS, V117, P0, DOI 10.1542/PEDS.2005-0620D
TRUE	3	0	2011	GARFINKLE J, 2011, EUR J PAEDIATR NEURO, V15, P222, DOI 10.1016/J.EJPN.2010.11.002
TRUE	3	0	1995	THORP JA, 1995, DRUGS, V49, P376, DOI 10.2165/00003495-199549030-00005
TRUE	3	0	2002	LEVENE M, 2002, ARCH DIS CHILD, V86, P75, DOI 10.1136/FN.86.2.F75
TRUE	3	0	1998	MURIALDO G, 1998, CLIN NEUROPHARMACOL, V21, P52
TRUE	3	0	2009	HERZOG AG, 2009, NEUROLOGY, V72, P911, DOI 10.1212/01.WNL.0000344167.78102.F0
TRUE	3	0	2002	OGURA H, 2002, J NEUROPATH EXP NEUR, V61, P956, DOI 10.1093/JNEN/61.11.956
TRUE	3	0	1993	HAUSER WA, 1993, EPILEPSIA, V34, P453, DOI 10.1111/J.1528-1157.1993.TB02586.X
TRUE	3	0	2001	YERBY MS, 2001, SEMIN PERINATOL, V25, P153, DOI 10.1053/SPER.2001.24900
TRUE	3	0	2005	FISHER RS, 2005, EPILEPSIA, V46, P470, DOI 10.1111/J.0013-9580.2005.66104.X
TRUE	3	0	1997	ELLER DP, 1997, OBSTET GYN CLIN N AM, V24, P523, DOI 10.1016/S0889-8545(05)70320-X
TRUE	3	0.01	1993	CORNELISSEN M, 1993, AM J OBSTET GYNECOL, V168, P884, DOI 10.1016/S0002-9378(12)90839-X
TRUE	3	0	1992	YERBY MS, 1992, NEUROLOGY, V42, P132
TRUE	3	0	2011	VERROTTI A, 2011, EPILEPSIA, V52, P199, DOI 10.1111/J.1528-1167.2010.02897.X
TRUE	3	0	2007	KIM JS, 2007, EPILEPSIA, V48, P19, DOI 10.1111/J.1528-1167.2007.01285.X
TRUE	3	0	2003	EJIRI N, 2003, EXP TOXICOL PATHOL, V54, P273, DOI 10.1078/0940-2993-00263
TRUE	3	0	2009	BROMLEY RL, 2009, CURR OPIN NEUROL, V22, P162, DOI 10.1097/WCO.0B013E3283292401
TRUE	3	0	2011	HOFFMANN AA, 2011, NATURE, V476, P454, DOI 10.1038/NATURE10356
TRUE	3	0	2006	PERUCCA E, 2006, BRIT J CLIN PHARMACO, V61, P246, DOI 10.1111/J.1365-2125.2005.02529.X
TRUE	3	0	1992	HIILESMAA VK, 1992, NEUROLOGY, V42, P8
TRUE	3	0	2008	HOVINGA CA, 2008, INT REV NEUROBIOL, V83, P241, DOI 10.1016/S0074-7742(08)00014-7
TRUE	3	0.02	2000	HVAS CL, 2000, BRIT J OBSTET GYNAEC, V107, P896, DOI 10.1111/J.1471-0528.2000.TB11089.X
TRUE	3	0	1996	SAWHNEY H, 1996, INT J GYNECOL OBSTET, V54, P17, DOI 10.1016/0020-7292(96)02683-5
TRUE	3	0	2013	CAMFIELD CS, 2013, BRAIN, V136, P593, DOI 10.1093/BRAIN/AWS352
TRUE	3	0	2004	KULTIMA K, 2004, ENVIRON HEALTH PERSP, V112, P1225, DOI 10.1289/TXG.7034
TRUE	3	0	2004	HATTIANGADY B, 2004, NEUROBIOL DIS, V17, P473, DOI 10.1016/J.NBD.2004.08.008
TRUE	3	0	2007	MEADOR KJ, 2007, EPILEPSY BEHAV, V11, P292, DOI 10.1016/J.YEBEH.2007.08.009
TRUE	3	0	2001	RATTYA J, 2001, NEUROLOGY, V56, P31, DOI 10.1212/WNL.56.1.31
TRUE	3	0	2002	CHA BH, 2002, EPILEPSY RES, V51, P217, DOI 10.1016/S0920-1211(02)00157-2
TRUE	3	0	1999	WINN LM, 1999, FREE RADICAL BIO MED, V26, P266, DOI 10.1016/S0891-5849(98)00193-2
TRUE	3	0	1999	HOWE AM, 1999, EPILEPSIA, V40, P980, DOI 10.1111/J.1528-1157.1999.TB00806.X
TRUE	3	0	2009	MCVEARRY KM, 2009, EPILEPSY BEHAV, V16, P609, DOI 10.1016/J.YEBEH.2009.09.024
TRUE	3	0	1998	PAL DK, 1998, INT J EPIDEMIOL, V27, P672, DOI 10.1093/IJE/27.4.672
TRUE	3	0.01	2013	MAHWINNEY E, 2013, NEUROLOGY, V80, P401
TRUE	3	0	2006	KOREN G, 2006, CAN FAM PHYSICIAN, V52, P441
TRUE	3	0.03	1998	BOJIC U, 1998, EUR J PHARMACOL, V354, P289, DOI 10.1016/S0014-2999(98)00462-2
TRUE	3	0	2012	VAJDA FJE, 2012, AUST NZ J OBSTET GYN, V52, P49, DOI 10.1111/J.1479-828X.2011.01359.X
TRUE	3	0	2011	WALKER T, 2011, NATURE, V476, P450, DOI 10.1038/NATURE10355
TRUE	3	0	1999	HERZOG AG, 1999, NEUROLOGY, V52, P1917, DOI 10.1212/WNL.52.9.1917-A
TRUE	3	0	2009	CHEN HQ, 2009, DRUG METAB DISPOS, V37, P1841, DOI 10.1124/DMD.109.026609
TRUE	3	0	2005	SCHARFMAN H, 2005, EXP NEUROL, V192, P348, DOI 10.1016/J.EXPNEUROL.2004.11.016
TRUE	3	0	2001	KOH S, 2001, ANN NEUROL, V50, P366, DOI 10.1002/ANA.1122
TRUE	3	0	2003	SANDER JW, 2003, CURR OPIN NEUROL, V16, P165, DOI 10.1097/01.WCO.0000063766.15877.8E
TRUE	3	0	2007	DUNCAN S, 2007, CURR OPIN NEUROL, V20, P175, DOI 10.1097/WCO.0B013E32805866FB
TRUE	3	0	2009	SABERS A, 2009, EPILEPSIA, V50, P2163, DOI 10.1111/J.1528-1167.2009.02166.X
TRUE	3	0	2000	UJHAZY E, 2000, BIOLOGIA, V55, P125
TRUE	3	0.01	1998	TOTH Z, 1998, J NEUROSCI, V18, P4285
TRUE	3	0	2001	VOLPE JJ, 2001, NEUROLOGY NEWBORN, V0, P0
TRUE	3	0	2004	LYNCH BA, 2004, P NATL ACAD SCI USA, V101, P9861, DOI 10.1073/PNAS.0308208101
TRUE	3	0	2011	AHIR BK, 2011, REPROD TOXICOL, V31, P66, DOI 10.1016/J.REPROTOX.2010.09.008
TRUE	3	0	1992	TANGANELLI P, 1992, NEUROLOGY, V42, P89
TRUE	3	0	2002	BIALER M, 2002, EPILEPSY RES, V51, P31, DOI 10.1016/S0920-1211(02)00106-7
TRUE	3	0	2007	SHOR S, 2007, CAN FAM PHYSICIAN, V53, P1007
TRUE	3	0	2006	EIKEL D, 2006, CHEM RES TOXICOL, V19, P272, DOI 10.1021/TX0502241
TRUE	3	0	2010	BANACH R, 2010, DRUG SAFETY, V33, P73, DOI 10.2165/11317640-000000000-00000
TRUE	3	0	2008	SHAH DK, 2008, PEDIATRICS, V121, P1146, DOI 10.1542/PEDS.2007-1839
TRUE	3	0	2006	WAGNER GC, 2006, J AUTISM DEV DISORD, V36, P779, DOI 10.1007/S10803-006-0117-Y
TRUE	3	0	2012	CIPOLLA MJ, 2012, EXP NEUROL, V234, P398, DOI 10.1016/J.EXPNEUROL.2012.01.005
TRUE	3	0	2007	MARSON AG, 2007, LANCET, V369, P1000, DOI 10.1016/S0140-6736(07)60460-7
TRUE	3	0.01	2012	MAN SL, 2012, PLOS ONE, V7, P0, DOI 10.1371/JOURNAL.PONE.0052339
TRUE	3	0	1998	PARMAN T, 1998, J BIOL CHEM, V273, P25079, DOI 10.1074/JBC.273.39.25079
TRUE	3	0	2007	VAJDA FJE, 2007, J CLIN NEUROSCI, V14, P611, DOI 10.1016/J.JOCN.2006.04.025
TRUE	3	0	2012	MAWHINNEY E, 2012, SEIZURE-EUR J EPILEP, V21, P215, DOI 10.1016/J.SEIZURE.2012.01.005
TRUE	3	0	2004	PATSALOS PN, 2004, CLIN PHARMACOKINET, V43, P707, DOI 10.2165/00003088-200443110-00002
TRUE	3	0	2009	WEGNER I, 2009, NEUROLOGY, V73, P1388, DOI 10.1212/WNL.0B013E3181BD8295
TRUE	3	0	2001	EJIRI N, 2001, EXP TOXICOL PATHOL, V53, P387, DOI 10.1078/0940-2993-00206
TRUE	3	0	2013	FUJII H, 2013, NEUROLOGY, V80, P1565, DOI 10.1212/WNL.0B013E31828F18C1
TRUE	3	0	2003	ISOHERRANEN N, 2003, EPILEPSIA, V44, P1280, DOI 10.1046/J.1528-1157.2003.21503.X
TRUE	3	0	2011	TEMKO A, 2011, CLIN NEUROPHYSIOL, V122, P474, DOI 10.1016/J.CLINPH.2010.06.035
TRUE	3	0	2004	FRENCH JA, 2004, NEUROLOGY, V62, P1252, DOI 10.1212/01.WNL.0000123693.82339.FC
TRUE	3	0	1999	FAHNEHJELM KT, 1999, ACTA OPHTHALMOL SCAN, V77, P530, DOI 10.1034/J.1600-0420.1999.770509.X
TRUE	3	0	2012	MARGULIS AV, 2012, AM J OBSTET GYNECOL, V207, P0, DOI 10.1016/J.AJOG.2012.07.008
TRUE	2	0	1993	RONEN GM, 1993, NEUROLOGY, V43, P1355, DOI 10.1212/WNL.43.7.1355
TRUE	2	0	1999	TAKEI Y, 1999, BRAIN DEV-JPN, V21, P253, DOI 10.1016/S0387-7604(99)00019-4
TRUE	2	0	1997	*AM C, 1997, INT J GYNECOL OBSTET, V56, P279
TRUE	2	0	2001	DANIELSON BR, 2001, CURR PHARM DESIGN, V7, P787, DOI 10.2174/1381612013397744
TRUE	2	0	1998	SCOTT BW, 1998, NEUROSCI LETT, V248, P73, DOI 10.1016/S0304-3940(98)00355-3
TRUE	2	0	2002	TOET MC, 2002, PEDIATRICS, V109, P772, DOI 10.1542/PEDS.109.5.772
TRUE	2	0	1997	DANIELSSON BR, 1997, DRUG TOXICITY EMBRYO, V2, P161
TRUE	2	0	2001	LE V, 2001, LANCET, V357, P183, DOI 10.1016/S0140-6736(00)03591-1
TRUE	2	0	2000	SHANK RP, 2000, EPILEPSIA S1, V41, P3
TRUE	2	0	2000	SHANK RP, 2000, EPILEPSIA, V41, P0, DOI 10.1111/J.1528-1157.2000.TB06045.X
TRUE	2	0	2001	MITCHELL TN, 2001, DRUG TODAY, V37, P665, DOI 10.1358/DOT.2001.37.10.704215
TRUE	2	0	2000	YERBY MS, 2000, PHARMACOTHERAPY, V20, P0, DOI 10.1592/PHCO.20.12.159S.35249
TRUE	2	0	1992	OMTZIGT JGC, 1992, EUR J CLIN PHARMACOL, V43, P381, DOI 10.1007/BF02220613
TRUE	2	0	1997	WELLS PG, 1997, MUTAT RES-FUND MOL M, V396, P65, DOI 10.1016/S0027-5107(97)00175-9
TRUE	2	0	2002	ADAB N, 2002, EPILEPSIA, V43, P230
TRUE	2	0	2002	HOLMES L, 2002, AM J OBSTET GYNECOL, V187, P5137
TRUE	2	0	1992	DRAVET C, 1992, NEUROLOGY, V42, P75
TRUE	2	0	1993	THISTED E, 1993, ARCH DIS CHILD, V69, P288, DOI 10.1136/ADC.69.3_SPEC_NO.288
TRUE	2	0	2001	PSCHIRRER ER, 2001, OBSTET GYN CLIN N AM, V28, P601, DOI 10.1016/S0889-8545(05)70221-7
TRUE	2	0	1997	RIDSDALE L, 1997, BRIT MED J, V314, P120, DOI 10.1136/BMJ.314.7074.120
TRUE	2	0	1993	YELESWARAM K, 1993, J PHARMACOL EXP THER, V267, P425
TRUE	2	0	1999	DEAN JCS, 1999, CLIN GENET, V56, P216, DOI 10.1034/J.1399-0004.1999.560306.X
TRUE	2	0	2001	HERNANDEZ-DIAZ S, 2001, AM J EPIDEMIOL, V153, P961, DOI 10.1093/AJE/153.10.961
TRUE	2	0	1995	HARRIS JA, 1995, ENVIRON HEALTH PERSP, V103, P163, DOI 10.2307/3432368
TRUE	2	0	1995	KANEKO S, 1995, CNS DRUGS, V3, P41, DOI 10.2165/00023210-199503010-00005
TRUE	2	0	1995	SINKINS SP, 1995, P ROY SOC B-BIOL SCI, V261, P325, DOI 10.1098/RSPB.1995.0154
TRUE	2	0	1998	LIU JL, 1998, J NEUROSCI, V18, P7768
TRUE	2	0	1998	WOOLLEY CS, 1998, EPILEPSIA, V39, P0, DOI 10.1111/J.1528-1157.1998.TB02601.X
TRUE	2	0	1998	WANG HS, 1998, SCIENCE, V282, P1890, DOI 10.1126/SCIENCE.282.5395.1890
TRUE	2	0	2002	THARP BR, 2002, EPILEPSIA, V43, P2, DOI 10.1046/J.1528-1157.43.S.3.11.X
TRUE	2	0	1994	LOSCHE G, 1994, ACTA PAEDIATR, V83, P961, DOI 10.1111/J.1651-2227.1994.TB13181.X
TRUE	2	0	2000	SKRADSKI S, 2000, EPILEPSIA, V41, P0
TRUE	2	0	2000	REIFF-ELDRIDGE R, 2000, AM J OBSTET GYNECOL, V182, P159, DOI 10.1016/S0002-9378(00)70506-0
TRUE	2	0	1996	PADMANABHAN R, 1996, REPROD TOXICOL, V10, P345, DOI 10.1016/0890-6238(96)00081-0
TRUE	2	0	1992	SACHDEO R, 1992, ANN NEUROL, V32, P386, DOI 10.1002/ANA.410320313
TRUE	2	0	2001	DOBSON SL, 2001, J MED ENTOMOL, V38, P382, DOI 10.1603/0022-2585-38.3.382
TRUE	2	0	1996	MENEGOLA E, 1996, TERATOGEN CARCIN MUT, V16, P97, DOI 10.1002/(SICI)1520-6866(1996)16:23.3.CO;2-E
TRUE	2	0	1999	FOX C, 1999, SEIZURE-EUR J EPILEP, V8, P367, DOI 10.1053/SEIZ.1999.0324
TRUE	2	0	1997	VALLEE M, 1997, J NEUROSCI, V17, P2626
TRUE	2	0	2002	PERUCCA E, 2002, CNS DRUGS, V16, P695, DOI 10.2165/00023210-200216100-00004
TRUE	2	0	1992	MITCHELL WG, 1992, PEDIATR NEUROL, V8, P19, DOI 10.1016/0887-8994(92)90047-3
TRUE	2	0	1999	LERCHE H, 1999, ANN NEUROL, V46, P305, DOI 10.1002/1531-8249(199909)46:33.0.CO;2-5
TRUE	2	0	1996	SHUSTER EA, 1996, MAYO CLIN PROC, V71, P991
TRUE	2	0	1996	BLATTER BM, 1996, EPIDEMIOLOGY, V7, P188, DOI 10.1097/00001648-199603000-00014
TRUE	2	0	2002	KAWADA K, 2002, BRAIN DEV-JPN, V24, P95, DOI 10.1016/S0387-7604(01)00407-7
TRUE	2	0	2000	GROUTAGE D, 2000, PROCEEDINGS OF THE TENTH IEEE WORKSHOP ON STATISTICAL SIGNAL AND ARRAY PROCESSING, V0, P598, DOI 10.1109/SSAP.2000.870195
TRUE	2	0	1997	WILLIAMS PG, 1997, DEV MED CHILD NEUROL, V39, P632
TRUE	2	0	2001	DOOSE H, 2001, EPILEPSY RES, V43, P103, DOI 10.1016/S0920-1211(00)00182-0
TRUE	2	0	1998	BACKONJA M, 1998, JAMA-J AM MED ASSOC, V280, P1831, DOI 10.1001/JAMA.280.21.1831
TRUE	2	0	1996	YERBY M, 1996, EPILEPSIA, V37, P98
TRUE	2	0	1998	VERITY CM, 1998, NEW ENGL J MED, V338, P1723, DOI 10.1056/NEJM199806113382403
TRUE	2	0	1999	CHRISTIAN SL, 1999, HUM MOL GENET, V8, P1025, DOI 10.1093/HMG/8.6.1025
TRUE	2	0	1992	DANSKY LV, 1992, NEUROLOGY, V42, P32
TRUE	2	0	2000	ROSS SA, 2000, PHYSIOL REV, V80, P1021
TRUE	2	0	1997	LOW JA, 1997, AM J OBSTET GYNECOL, V176, P957, DOI 10.1016/S0002-9378(97)70385-5
TRUE	2	0	1997	BENGZON J, 1997, P NATL ACAD SCI USA, V94, P10432, DOI 10.1073/PNAS.94.19.10432
TRUE	2	0	1995	LIEN JM, 1995, OBSTET GYNECOL, V85, P163, DOI 10.1016/0029-7844(94)00375-N
TRUE	2	0	2000	ZHANG XL, 2000, EPILEPSIA, V41, P0
TRUE	2	0	1999	GOULD E, 1999, NAT NEUROSCI, V2, P260, DOI 10.1038/6365
TRUE	2	0	2003	WILLIAMS WJ, 2003, TIME FREQUENCY SIGNA, V0, P168
TRUE	2	0	1995	TURELLI M, 1995, GENETICS, V140, P1319
TRUE	2	0	2003	YERBY M, 2003, EPILEPSIA, V3, P33
TRUE	2	0	2001	KOZMA C, 2001, AM J MED GENET, V98, P168, DOI 10.1002/1096-8628(20010115)98:23.0.CO;2-O
TRUE	2	0	1994	LANGER B, 1994, FETAL DIAGN THER, V9, P155, DOI 10.1159/000263924
TRUE	2	0	2000	PERUCCA E, 2000, EPILEPSY RES, V41, P107, DOI 10.1016/S0920-1211(00)00124-8
TRUE	2	0	1992	GLADSTONE DJ, 1992, REPROD TOXICOL, V6, P257, DOI 10.1016/0890-6238(92)90181-R
TRUE	2	0	1994	BERGERSWEENEY J, 1994, J NEUROSCI, V14, P4507
TRUE	2	0	1996	BOWDEN CL, 1996, AM J PSYCHIAT, V153, P765
TRUE	2	0	2001	MENEGOLA E, 2001, TERATOLOGY, V64, P125, DOI 10.1002/TERA.1055
TRUE	2	0	2000	DEAN JCS, 2000, SEIZURE-EUR J EPILEP, V9, P233, DOI 10.1053/SEIZ.2000.0392
TRUE	2	0	1997	GRETHER JK, 1997, JAMA-J AM MED ASSOC, V278, P207, DOI 10.1001/JAMA.278.3.207
TRUE	2	0	1999	BAXTER P, 1999, ARCH DIS CHILD, V81, P431, DOI 10.1136/ADC.81.5.431
TRUE	2	0.01	1995	FINNELL RH, 1995, TERATOLOGY, V52, P324, DOI 10.1002/TERA.1420520603
TRUE	2	0	1993	HERKES GK, 1993, EPILEPSY RES, V15, P47, DOI 10.1016/0920-1211(93)90008-U
TRUE	2	0	2000	SANKAR R, 2000, EPILEPSIA, V41, P0, DOI 10.1111/J.1528-1157.2000.TB01557.X
TRUE	2	0	1999	KORNACK DR, 1999, P NATL ACAD SCI USA, V96, P5768, DOI 10.1073/PNAS.96.10.5768
TRUE	2	0	1992	LEAVITT AM, 1992, NEUROLOGY, V42, P141
TRUE	2	0	1999	NIEBAUER M, 1999, BRAIN RES, V837, P263, DOI 10.1016/S0006-8993(99)01615-7
TRUE	2	0	1999	GOULD E, 1999, BIOL PSYCHIAT, V46, P1472, DOI 10.1016/S0006-3223(99)00247-4
TRUE	2	0	1998	MENEGOLA E, 1998, INT J DEV BIOL, V42, P99
TRUE	2	0	1999	FANTEL AG, 1999, TERATOLOGY, V60, P151, DOI 10.1002/(SICI)1096-9926(199909)60:33.3.CO;2-5
TRUE	2	0	1999	SCHMID R, 1999, NEUROLOGY, V53, P1754, DOI 10.1212/WNL.53.8.1754
TRUE	2	0	1999	OHMORI H, 1999, J NEUROCHEM, V72, P1497, DOI 10.1046/J.1471-4159.1999.721497.X
TRUE	2	0	1993	LOMBROSO CT, 1993, ELECTROENCEPHALOGRAP, V0, P802
TRUE	2	0	1997	SCHER MS, 1997, CLIN PERINATOL, V24, P735
TRUE	2	0	1999	GOULD E, 1999, P NATL ACAD SCI USA, V96, P5263, DOI 10.1073/PNAS.96.9.5263
TRUE	2	0	1998	BRADAI R, 1998, JOURNAL DE GYNECOLOGIE OBSTETRIQUE ET BIOLOGIE DE LA REPRODUCTION, V27, P413
TRUE	2	0	2002	HOLMES GL, 2002, NEUROREPORT, V13, P0, DOI 10.1097/00001756-200201210-00002
TRUE	2	0	2000	MADSEN TM, 2000, BIOL PSYCHIAT, V47, P1043, DOI 10.1016/S0006-3223(00)00228-6
TRUE	2	0	1999	SPIEGELSTEIN O, 1999, EPILEPSIA, V40, P545, DOI 10.1111/J.1528-1157.1999.TB05555.X
TRUE	2	0	1996	DAVIES MP, 1996, CIRC RES, V78, P15, DOI 10.1161/01.RES.78.1.15
TRUE	2	0	1999	GUBERMAN A, 1999, NEUROLOGY, V53, P0
TRUE	2	0	1995	GREEN MD, 1995, DRUG METAB DISPOS, V23, P299
TRUE	2	0	1999	HONEIN MA, 1999, TERATOLOGY, V60, P356, DOI 10.1002/(SICI)1096-9926(199912)60:63.0.CO;2-B
TRUE	2	0	1995	DAVIS BA, 1995, AM J CLIN NUTR, V62, P782
TRUE	2	0	1999	NABBOUT R, 1999, ARCH DIS CHILD, V81, P0, DOI 10.1136/FN.81.2.F125
TRUE	2	0	1993	STAFSTROM CE, 1993, EPILEPSIA, V34, P420, DOI 10.1111/J.1528-1157.1993.TB02582.X
TRUE	2	0	2003	ISOHERRANEN N, 2003, PHARMACEUT RES, V20, P1293, DOI 10.1023/A:1025069519218
TRUE	2	0	1999	BIALER M, 1999, J CONTROL RELEASE, V62, P187, DOI 10.1016/S0168-3659(99)00037-1
TRUE	2	0	1993	SHARONY R, 1993, PRENATAL DIAG, V13, P909, DOI 10.1002/PD.1970131005
TRUE	2	0	1997	HO SS, 1997, NEUROLOGY, V49, P1382, DOI 10.1212/WNL.49.5.1382
TRUE	2	0	1998	PAL DK, 1998, LANCET, V351, P19, DOI 10.1016/S0140-6736(97)06250-8
TRUE	2	0	2000	BOWDEN CL, 2000, ARCH GEN PSYCHIAT, V57, P481, DOI 10.1001/ARCHPSYC.57.5.481
TRUE	2	0	1998	MIZRAHI EM, 1998, DIAGNOSIS MANAGEMENT, V0, P0
TRUE	2	0	1998	ZAHN C, 1998, EPILEPSIA, V39, P0, DOI 10.1111/J.1528-1157.1998.TB02604.X
TRUE	2	0	1996	KUHN HG, 1996, J NEUROSCI, V16, P2027
TRUE	2	0	1997	RAYBURN WF, 1997, J MATERN-FETAL INVES, V7, P3
TRUE	2	0	1994	VALIMAKI MJ, 1994, J BONE MINER RES, V9, P631
TRUE	2	0	2000	DUBE C, 2000, ANN NEUROL, V47, P336, DOI 10.1002/1531-8249(200003)47:33.3.CO;2-N
TRUE	2	0	1998	MORRISON L, 1998, ASTRON GEOPHYS, V39, P8, DOI 10.1093/ASTROG/39.5.5.8
TRUE	2	0	1997	YERBY MS, 1997, EPILEPSY COMPREHENSI, V0, P1195
TRUE	2	0	1995	CATALTEPE O, 1995, PEDIATR RES, V38, P251, DOI 10.1203/00006450-199508000-00019
TRUE	2	0	2001	WIRRELL EC, 2001, PEDIATR RES, V50, P445, DOI 10.1203/00006450-200110000-00005
TRUE	2	0	1995	WINN LM, 1995, MOL PHARMACOL, V48, P112
TRUE	2	0	2001	HARRINGTON LC, 2001, J MED ENTOMOL, V38, P411, DOI 10.1603/0022-2585-38.3.411
TRUE	2	0	2001	BRIEGEL H, 2001, J MED ENTOMOL, V38, P557, DOI 10.1603/0022-2585-38.4.557
TRUE	2	0	1997	PIENIMAKI P, 1997, EPILEPSIA, V38, P309, DOI 10.1111/J.1528-1157.1997.TB01122.X
TRUE	2	0	1992	WILCOX AJ, 1992, AM J PUBLIC HEALTH, V82, P378, DOI 10.2105/AJPH.82.3.378
TRUE	2	0	1998	PARENT JM, 1998, NEUROSCI LETT, V247, P9, DOI 10.1016/S0304-3940(98)00269-9
TRUE	2	0	1995	CUMMINGS LN, 1995, EPILEPSIA, V36, P355, DOI 10.1111/J.1528-1157.1995.TB01009.X
TRUE	2	0	1997	OTSUKA Y, 1997, MEDICAL ENTOMOLOGY AND ZOOLOGY, V48, P257
TRUE	2	0	2000	DANIELSSON B, 2000, TOXICOL APPL PHARM, V163, P164, DOI 10.1006/TAAP.1999.8858
TRUE	2	0	1994	YERBY MS, 1994, NEUROL CLIN, V12, P749
TRUE	2	0	1998	EL-SAYED YY, 1998, EPILEPSIA, V39, P0, DOI 10.1111/J.1528-1157.1998.TB02603.X
TRUE	2	0	1997	BATTAGLIA A, 1997, NEUROLOGY, V48, P1081, DOI 10.1212/WNL.48.4.1081
TRUE	2	0	2001	GARY RE, 2001, J MED ENTOMOL, V38, P22, DOI 10.1603/0022-2585-38.1.22
TRUE	2	0	1999	BALEN A, 1999, LANCET, V354, P966, DOI 10.1016/S0140-6736(99)00218-4
TRUE	2	0	1995	CUMMINGS SR, 1995, NEW ENGL J MED, V332, P767, DOI 10.1056/NEJM199503233321202
TRUE	2	0	1994	BAN Y, 1994, ARCH TOXICOL, V69, P65, DOI 10.1007/S002040050139
TRUE	2	0	2001	MEINARDI H, 2001, EPILEPSIA, V42, P136, DOI 10.1046/J.1528-1157.2001.32800.X
TRUE	2	0	2000	FELDKAMP J, 2000, EXP CLIN ENDOCR DIAB, V108, P37
TRUE	2	0	2000	APELAND T, 2000, ACTA NEUROL SCAND, V101, P217, DOI 10.1034/J.1600-0404.2000.101004217X./
TRUE	2	0	1993	JANZ D, 1993, EPILEPSIA, V34, P588
TRUE	2	0	1993	ENGELSKJON T, 1993, EPILEPSIA S2, V34, P123
TRUE	2	0	1996	WEBSTER WS, 1996, TERATOLOGY, V53, P168, DOI 10.1002/(SICI)1096-9926(199603)53:33.0.CO;2-0
TRUE	2	0	2002	DOBSON SL, 2002, GENETICS, V160, P1087
TRUE	2	0	1996	BRODIE MJ, 1996, NEW ENGL J MED, V334, P168, DOI 10.1056/NEJM199601183340308
TRUE	2	0	1997	MULINARE J, 1997, TERATOLOGY, V56, P17, DOI 10.1002/(SICI)1096-9926(199707/08)56:1/23.0.CO;2-Z
TRUE	2	0	1995	HENRIKSEN TB, 1995, EPIDEMIOLOGY, V6, P533, DOI 10.1097/00001648-199509000-00012
TRUE	2	0	1998	GRAY WP, 1998, BRAIN RES, V790, P52, DOI 10.1016/S0006-8993(98)00030-4
TRUE	2	0	1998	OAKLEY G, 1998, BULL WORLD HEALTH ORGAN, V76 SUPPL 2, P116
TRUE	2	0	1992	DELGADOESCUETA AV, 1992, NEUROLOGY, V42, P149
TRUE	2	0	1997	MONTECOT C, 1997, J CEREBR BLOOD F MET, V17, P94, DOI 10.1097/00004647-199701000-00012
TRUE	2	0	2000	KANEKO S, 2000, EPILEPSIA, V41, P8, DOI 10.1111/J.1528-1157.2000.TB02211.X
TRUE	2	0	2003	YERBY MS, 2003, EPILEPSIA, V44, P33, DOI 10.1046/J.1528-1157.2003.T01-1-44703.X-I1
TRUE	2	0	1997	LUNDBERG PO, 1997, CEPHALALGIA, V17, P42, DOI 10.1177/0333102497017S2013
TRUE	2	0	1999	LAMPEN A, 1999, TOXICOL APPL PHARM, V160, P238, DOI 10.1006/TAAP.1999.8770
TRUE	2	0	2000	FONAGER K, 2000, ACTA NEUROL SCAND, V101, P289, DOI 10.1034/J.1600-0404.2000.90193A.X
TRUE	2	0	1996	LANSKA MJ, 1996, PEDIATR NEUROL, V15, P120, DOI 10.1016/0887-8994(96)00155-5
TRUE	2	0	1995	DEAN JC, 1995, EPILEPSIA, V36, P72
TRUE	2	0	2000	FISHER RS, 2000, EPILEPSY RES, V41, P39, DOI 10.1016/S0920-1211(00)00126-1
TRUE	2	0	1998	GOSPE SM, 1998, J PEDIATR-US, V132, P919, DOI 10.1016/S0022-3476(98)70384-1
TRUE	2	0.01	2000	SHAH VP, 2000, PHARM RES, V17, P1551, DOI 10.1023/A:1007669411738
TRUE	2	0	1995	LEVY RH, 1995, ..., V0, P605
TRUE	2	0	2000	DESSENS AB, 2000, ACTA PAEDIATR, V89, P533, DOI 10.1080/080352500750027808
TRUE	2	0	1999	TODOROVA MT, 1999, EPILEPSIA, V40, P1697, DOI 10.1111/J.1528-1157.1999.TB01586.X
TRUE	2	0	1995	BRINER W, 1995, TERATOLOGY, V52, P306, DOI 10.1002/TERA.1420520509
TRUE	2	0	1998	SINGH NA, 1998, NAT GENET, V18, P25, DOI 10.1038/NG0198-25
TRUE	2	0	2000	BEGLEY CE, 2000, EPILEPSIA, V41, P342, DOI 10.1111/J.1528-1157.2000.TB00166.X
TRUE	2	0	2003	GRYDER DS, 2003, J NEUROSCI, V23, P7069, DOI 10.1523/JNEUROSCI.23-18-07069.2003
TRUE	2	0	1992	CZEIZEL AE, 1992, NEW ENGL J MED, V327, P1832, DOI 10.1056/NEJM199212243272602
TRUE	2	0	2000	NAKAGAWA E, 2000, EPILEPSIA, V41, P10, DOI 10.1111/J.1528-1157.2000.TB01498.X
TRUE	2	0	1995	ITO S, 1995, AM J OBSTET GYNECOL, V172, P881, DOI 10.1016/0002-9378(95)90015-2
TRUE	2	0	1999	FINNELL RH, 1999, REPROD TOXICOL, V13, P85, DOI 10.1016/S0890-6238(98)00067-7
TRUE	2	0	2000	VILLENEUVE N, 2000, ANN NEUROL, V47, P729, DOI 10.1002/1531-8249(200006)47:63.0.CO;2-C
TRUE	2	0	2001	CHRISTENSEN J, 2001, THER DRUG MONIT, V23, P529, DOI 10.1097/00007691-200110000-00006
TRUE	2	0	1997	KUMAR S, 1997, J PHARMACOL EXP THER, V282, P617
TRUE	2	0	1995	HELLSTROMWESTAS L, 1995, ARCH DIS CHILD, V72, P0, DOI 10.1136/FN.72.2.F97
TRUE	2	0	1997	ROSENFELD WE, 1997, EPILEPSIA, V38, P317, DOI 10.1111/J.1528-1157.1997.TB01123.X
TRUE	2	0	1997	GOULD E, 1997, J NEUROSCI, V17, P2492
TRUE	2	0	1997	HALL JL, 1997, TERATOLOGY, V55, P306, DOI 10.1002/(SICI)1096-9926(199705)55:53.3.CO;2-W
TRUE	2	0	1999	WELLFELT K, 1999, REPROD TOXICOL, V13, P93, DOI 10.1016/S0890-6238(98)00066-5
TRUE	2	0	2002	HERON SE, 2002, LANCET, V360, P851, DOI 10.1016/S0140-6736(02)09968-3
TRUE	2	0	1996	RODIER PM, 1996, J COMP NEUROL, V370, P247, DOI 10.1002/(SICI)1096-9861(19960624)370:23.0.CO;2-2
TRUE	2	0	1996	WERLER MM, 1996, JAMA-J AM MED ASSOC, V275, P1089, DOI 10.1001/JAMA.275.14.1089
TRUE	2	0	1992	KOCH S, 1992, NEUROLOGY, V42, P83
TRUE	2	0	1995	SUTULA T, 1995, J NEUROSCI, V15, P8295
TRUE	2	0	2001	LANDROT ID, 2001, DEV BRAIN RES, V129, P27
TRUE	2	0	1997	KEMPERMANN G, 1997, NATURE, V386, P493, DOI 10.1038/386493A0
TRUE	2	0	2001	HONEIN MA, 2001, JAMA-J AM MED ASSOC, V285, P2981, DOI 10.1001/JAMA.285.23.2981
TRUE	2	0	2001	KARCESKI S, 2001, EPILEPSY BEHAV, V2, P0, DOI 10.1006/EBEH.2001.0283
TRUE	2	0	2001	KLEBERMASS K, 2001, CHILD NERV SYST, V17, P544
TRUE	2	0	2000	MAGAVI SS, 2000, NATURE, V405, P951
TRUE	2	0	1995	SELLER MJ, 1995, CLIN DYSMORPHOL, V4, P93
TRUE	2	0	1998	NAKOS G, 1998, LINEAR ALGEBRA APPL, V0, P0
TRUE	2	0	1997	ONEILL SL, 1997, INSECT MOL BIOL, V6, P33, DOI 10.1046/J.1365-2583.1997.00157.X
TRUE	2	0	1997	APPLETON RE, 1997, SEIZURE, V6, P27, DOI 10.1016/S1059-1311(97)80049-0
TRUE	2	0	1996	SABRY MA, 1996, AM J MED GENET, V62, P410, DOI 10.1002/AJMG.1320620403
TRUE	2	0	1992	KANEKO S, 1992, NEUROLOGY, V42, P68
TRUE	2	0	1997	GRAVES NH, 1997, TREATMENT EPILEPSY, V0, P833
TRUE	2	0	1995	THORP JA, 1995, OBSTET GYNECOL, V86, P1, DOI 10.1016/0029-7844(95)00091-5
TRUE	2	0	2001	BOASHASH B, 2001, IEEE ENG MED BIOL, V20, P54, DOI 10.1109/51.956820
TRUE	2	0	2001	LISTON HL, 2001, J CLIN PSYCHOPHARM, V21, P500, DOI 10.1097/00004714-200110000-00008
TRUE	2	0	2001	SMITH-SWINTOSKY VL, 2001, NEUROREPORT, V12, P1031, DOI 10.1097/00001756-200104170-00033
TRUE	2	0	1996	FANTEL AG, 1996, TERATOLOGY, V53, P196, DOI 10.1002/(SICI)1096-9926(199603)53:33.0.CO;2-2
TRUE	2	0	1998	EVANS D, 1998, ARCH DIS CHILD, V78, P0, DOI 10.1136/FN.78.1.F70
TRUE	2	0	2003	ISOHERRANEN N, 2003, CURR OPIN NEUROL, V16, P203, DOI 10.1097/01.WCO.0000063774.81810.30
TRUE	2	0	1996	GREENBERG MK, 1996, NEUROLOGY, V47, P600
TRUE	2	0	1995	MILLS JL, 1995, LANCET, V345, P149, DOI 10.1016/S0140-6736(95)90165-5
TRUE	2	0	1995	FREIL J, 1995, AM J MED GENET, V55, P195
TRUE	2	0	1997	ROCHESTER JA, 1997, AM FAM PHYSICIAN, V56, P1631
TRUE	2	0	2000	GREENBERG DA, 2000, AM J HUM GENET, V66, P508, DOI 10.1086/302763
TRUE	2	0	2001	BAUER J, 2001, EPILEPSIA, V42, P20, DOI 10.1046/J.1528-1157.2001.042SUPPL.3020.X
TRUE	2	0	1995	BOUSSEMART T, 1995, EUR J PEDIATR, V154, P220, DOI 10.1007/S004310050279
TRUE	2	0	1999	CHEN K, 1999, NAT MED, V5, P888, DOI 10.1038/11330
TRUE	2	0	1997	TANAKA K, 1997, SCIENCE, V276, P1699, DOI 10.1126/SCIENCE.276.5319.1699
TRUE	2	0	2001	JELTSCH H, 2001, NEUROBIOL LEARN MEM, V76, P81, DOI 10.1006/NLME.2000.3986
TRUE	2	0	2000	MALBERG JE, 2000, J NEUROSCI, V20, P9104
TRUE	2	0	2001	MORRELL MJ, 2001, CNS SPECTR, V6, P771
TRUE	2	0	1999	NAKSATHIT AT, 1999, J MED ENTOMOL, V36, P13, DOI 10.1093/JMEDENT/36.1.13
TRUE	2	0	1994	ABRAHAMSSON C, 1994, CARDIOVASC RES, V28, P337, DOI 10.1093/CVR/28.3.337
TRUE	2	0	1997	NOBILE M, 1997, BRIT J PHARMACOL, V120, P647, DOI 10.1038/SJ.BJP.0700969
TRUE	2	0	2001	MEADOR KJ, 2001, TREATMENT EPILEPSY P, V0, P1215
TRUE	2	0	1995	BYE AME, 1995, EPILEPSIA, V36, P1009, DOI 10.1111/J.1528-1157.1995.TB00960.X
TRUE	2	0	1995	GOLDEN JA, 1995, PEDIATRICS, V95, P506
TRUE	2	0	2001	BAXTER P, 2001, DEV MED CHILD NEUROL, V43, P416, DOI 10.1017/S0012162201000779
TRUE	2	0	1996	GULDNER GT, 1996, EPILEPSIA, V37, P1211, DOI 10.1111/J.1528-1157.1996.TB00555.X
TRUE	2	0	1999	BAGGOT PJ, 1999, EPILEPSIA, V40, P512, DOI 10.1111/J.1528-1157.1999.TB00750.X
TRUE	2	0	1998	HOLMES GL, 1998, NEURON, V21, P1231, DOI 10.1016/S0896-6273(00)80642-X
TRUE	2	0	1994	MIZRAHI EM, 1994, INT PEDIAT, V9, P94
TRUE	2	0	1994	TOMSON T, 1994, EPILEPSIA, V35, P131, DOI 10.1111/J.1528-1157.1994.TB02922.X
TRUE	2	0	1997	SCOTT TW, 1997, AM J TROP MED HYG, V57, P235, DOI 10.4269/AJTMH.1997.57.235
TRUE	2	0	1997	SCHEFFER IE, 1997, BRAIN, V120, P479, DOI 10.1093/BRAIN/120.3.479
TRUE	2	0	1999	BETTS T, 1999, SEIZURE-EUR J EPILEP, V8, P322, DOI 10.1053/SEIZ.1999.0325
TRUE	2	0	2002	BRIEGEL H, 2002, J INSECT PHYSIOL, V48, P547, DOI 10.1016/S0022-1910(02)00072-0
TRUE	2	0	2002	SHANKARAN S, 2002, AM J OBSTET GYNECOL, V187, P171, DOI 10.1067/MOB.2002.122445
TRUE	2	0	1998	JENSEN FE, 1998, J NEUROPHYSIOL, V79, P73
TRUE	2	0	1999	AL BM, 1999, SEIZURE-EUR J EPILEP, V8, P26, DOI 10.1053/SEIZ.1998.0239
TRUE	2	0	1998	BERKOVIC SF, 1998, ANN NEUROL, V43, P435, DOI 10.1002/ANA.410430405
TRUE	2	0	2000	MCLEAN MJ, 2000, EPILEPSIA, V41, P0, DOI 10.1111/J.1528-1157.2000.TB06043.X
TRUE	2	0	2001	FOLDVARY N, 2001, NEUROL CLIN, V19, P409, DOI 10.1016/S0733-8619(05)70024-4
TRUE	2	0	1997	YERBY MS, 1997, EPILEPSIA, V38, P957, DOI 10.1111/J.1528-1157.1997.TB01476.X
TRUE	2	0	2001	CELKA P, 2001, IEEE ENG MED BIOL, V20, P30, DOI 10.1109/51.956817
TRUE	2	0	1995	YU DC, 1995, J CHROMATOGR B, V666, P269, DOI 10.1016/0378-4347(94)00585-S
TRUE	2	0	1995	DEFEO MR, 1995, PHARMACOL RES, V31, P137, DOI 10.1016/1043-6618(95)80060-3
TRUE	2	0	1999	KAPLAN PW, 1999, REV NEUROL-FRANCE, V155, P335
TRUE	2	0	1999	STEPHEN LJ, 1999, SEIZURE-EUR J EPILEP, V8, P339, DOI 10.1053/SEIZ.1999.0301
TRUE	2	0	1999	SALIBA RM, 1999, AM J EPIDEMIOL, V150, P763
TRUE	2	0	1997	WHITE HS, 1997, EPILEPSY RES, V28, P167, DOI 10.1016/S0920-1211(97)00045-4
TRUE	2	0	1998	BIERVERT C, 1998, SCIENCE, V279, P403, DOI 10.1126/SCIENCE.279.5349.403
TRUE	2	0	1997	MALONE FD, 1997, SEMIN PERINATOL, V21, P114, DOI 10.1016/S0146-0005(97)80054-7
TRUE	2	0	1999	KAFALI G, 1999, CLIN PEDIATR, V38, P93, DOI 10.1177/000992289903800205
TRUE	2	0	2000	AMICARELLI F, 2000, TERATOLOGY, V62, P100, DOI 10.1002/1096-9926(200008)62:23.3.CO;2-4
TRUE	2	0	1995	BAILLIE TA, 1995, ..., V0, P589
TRUE	2	0	1995	HANSEN DK, 1995, TERATOLOGY, V52, P277, DOI 10.1002/TERA.1420520506
TRUE	2	0	1994	DESSENS AB, 1994, ACTA PAEDIATR, V83, P54, DOI 10.1111/J.1651-2227.1994.TB13385.X
TRUE	2	0	1999	NAKSATHIT AT, 1999, J MED ENTOMOL, V36, P8, DOI 10.1093/JMEDENT/36.1.8
TRUE	2	0	1996	VANVLEYMEN B, 1996, ACTA NEUROL BELG, V96, P270
TRUE	2	0	2000	DODGSON SJ, 2000, EPILEPSIA, V41, P0, DOI 10.1111/J.1528-1157.2000.TB06047.X
TRUE	2	0	1995	SHETH RD, 1995, J PEDIATR-US, V127, P256, DOI 10.1016/S0022-3476(95)70304-7
TRUE	2	0	2002	WIDE K, 2002, ACTA PAEDIATR, V91, P409, DOI 10.1080/080352502317371643
